# Supplementary material for: WGCNA Identifies a Comprehensive Gene Co-Expression Network Associated with Development in autotetraploid potato tissues
Source: Preprints.org preprint supplement (doi:10.20944/preprints202304.0493.v1), 2023-04-18
Supplement: Supplementary file 1 [file Supplementary tables.xlsx]

## Sheet: Table S1
Table S1. Quality of evaluation of sequencing data.
#Sample	Raw Bases Number	Clean Bases Number	Low-quality Reads Number	Clean Q30 Bases Rate(%)	Clean GC percent(%)	Mapped Reads	Mapping Rate	Unique mapped reads
TFS_root_1	6949371300	6638829900	418666	94.39	43.33	32630312	0.7373	11,864,528(65.50%)
TFS_root_2	6930582900	6659761800	348384	94.69	43.3	32032874	0.7215	11,266,337(62.53%)
TFS_root_3	6365622300	6069243900	358868	94.47	43.12	30844295	0.7623	11,295,901(66.75%)
TFS_stem_1	6919169100	6547923300	307482	94.74	44.33	32311412	0.7402	12,081,745(72.76%)
TFS_stem_2	6908275800	6617111400	368330	94.77	43.87	33796582	0.7661	13,034,735(73.50%)
TFS_stem_3	7248958800	6880356600	372448	94.83	43.91	35318206	0.77	13,665,433(73.82%)
TFS_leaf_1	6222484200	5912619600	318488	94.95	44.7	30665948	0.778	10,946,731(75.96%)
TFS_leaf_2	7382529900	7039841100	474468	94.86	45.87	33917078	0.7227	11,511,934(75.26%)
TFS_leaf_3	7101991500	6815534100	420502	94.82	44.28	35289032	0.7767	12,318,883(74.00%)
SS_root_1	7408592700	7088680200	533260	94.14	43	37033398	0.7836	13,517,637(66.83%)
SS_root_2	7058916600	6775442700	398232	94.26	43.35	35458765	0.785	12,558,501(67.11%)
SS_root_3	6931317900	6616711200	337638	94.31	43.33	33261159	0.754	11,899,057(65.95%)
SS_stem_1	6659552100	6387083100	289968	94.43	43.85	32435370	0.7617	12,515,967(72.96%)
SS_stem_2	6531889200	6217507200	432594	93.99	43.71	31630957	0.7631	11,796,872(69.67%)
SS_stem_3	7204069500	6928430700	459760	94.42	43.64	35721869	0.7734	12,835,784(69.99%)
SS_leaf_1	7518860700	7118223900	514758	94.52	44.14	36111301	0.761	12,892,974(71.23%)
SS_leaf_2	6853407000	6541280700	414916	94.39	44.12	34614104	0.7937	12,105,460(74.34%)
SS_leaf_3	7518120300	7166552700	479592	94.29	44.61	37499799	0.7849	13,316,748(75.84%)
TES_root_1	7249232400	6998048400	410712	93.27	44.12	31010877	0.6647	10,821,556(65.84%)
TES_root_2	6583906500	6325387500	497122	92.88	42.81	32824511	0.7784	11,962,373(68.26%)
TES_root_3	5613400800	5366712300	490510	91.89	42.77	27852091	0.7785	10,256,891(68.66%)
TES_stem_1	7159072200	6881967000	397182	93.81	43.82	34592127	0.754	12,610,375(71.97%)
TES_stem_2	6130354200	5852266800	480752	93.16	43.95	29553392	0.7575	10,842,715(73.71%)
TES_stem_3	6035679600	5785872300	371104	93.96	43.93	28744906	0.7452	10,713,179(71.90%)
TES_leaf_1	6614623500	6329832000	488986	92.89	43.95	33092213	0.7842	11,855,181(75.48%)
TES_leaf_2	7223887200	6904607100	621406	93.37	43.97	36526499	0.7935	13,196,614(76.83%)
TES_leaf_3	6097589100	5892399900	356982	93.25	45.6	28203971	0.718	9,342,073(74.82%)
		176358227400			45.87		0.7937
		5366712300		91.89	42.77		0.6647

## Sheet: Table S2
Table S2 Distribution of gene number in co-expression modules.
Module name	Gene number	Annotation gene number
black	150
cyan	150
darkgreen	150
darkorange	150
darkturquoise	94
grey60	150
lightsteelblue1	133
midnightblue	150
paleturquoise	78
plum1	41
red	150
steelblue	150
	1546
	150
	41

## Sheet: Table S3
Table S3. GO enrichment analysis of four target modules.
Module	Ontology	Accession	Term_name	p-value	FDR	Background_Count	model_gene_Count
Steelblue	Biological Process	GO:0005975	carbohydrate metabolic process	7.91e-07	0.000888203	1228	34
		GO:0006809	nitric oxide biosynthetic process	2.9e-06	0.00108682	10	4
		GO:0046209	nitric oxide metabolic process	2.9e-06	0.00108682	10	4
		GO:0016052	carbohydrate catabolic process	1.98e-05	0.00555128	374	15
		GO:2000895	hemicellulose catabolic process	5.17e-05	0.0116204	37	5
		GO:0000272	polysaccharide catabolic process	0.000171369	0.0320746	262	11
		GO:0006772	thiamine metabolic process	0.000351441	0.0339034	13	3
		GO:0009228	thiamine biosynthetic process	0.000272562	0.0339034	12	3
		GO:0051513	regulation of monopolar cell growth	0.00036228	0.0339034	3	2
		GO:0042723	thiamine-containing compound metabolic process	0.000351441	0.0339034	13	3
		GO:0042724	thiamine-containing compound biosynthetic process	0.000351441	0.0339034	13	3
		GO:0044347	cell wall polysaccharide catabolic process	0.00026957	0.0339034	52	5
		GO:0006085	acetyl-CoA biosynthetic process	0.000443644	0.038324	14	3
	Cellular Component
		GO:0005576	extracellular region	7.9e-07	0.000119	1344	36
		GO:0005773	vacuole	0.000586	0.021778	621	17
		GO:0048046	apoplast	0.000295	0.021778	425	14
		GO:0030312	external encapsulating structure	0.000721	0.021778	871	21
		GO:0005618	cell wall	0.000595	0.021778	858	21
	Molecular Function
		GO:0016798	hydrolase activity, acting on glycosyl bonds	1.74e-08	8.39e-06	474	22
		GO:0004553	hydrolase activity, hydrolyzing O-glycosyl compounds	6.85e-08	1.65e-05	427	20
		GO:0016787	hydrolase activity	1.05e-06	0.000169	3403	67
		GO:0015925	galactosidase activity	1.48e-06	0.000179	33	6
		GO:0052596	phenethylamine:oxygen oxidoreductase (deaminating) activity	9.63e-06	0.000581	13	4
		GO:0052593	tryptamine:oxygen oxidoreductase (deaminating) activity	9.63e-06	0.000581	13	4
		GO:0052594	aminoacetone:oxygen oxidoreductase(deaminating) activity	9.63e-06	0.000581	13	4
		GO:0052595	aliphatic amine oxidase activity	9.63e-06	0.000581	13	4
		GO:0003824	catalytic activity	2.68e-05	0.001436	11269	157
		GO:0008131	primary amine oxidase activity	3.1e-05	0.001495	17	4
		GO:0016641	oxidoreductase activity, acting on the CH-NH2 group of donors, oxygen as acceptor	6.14e-05	0.002696	20	4
		GO:0004185	serine-type carboxypeptidase activity	8.58e-05	0.003454	41	5
		GO:0004180	carboxypeptidase activity	0.000184	0.00684	48	5
		GO:0070008	serine-type exopeptidase activity	0.000203	0.00701	49	5
		GO:0004565	beta-galactosidase activity	0.000278	0.008963	29	4
		GO:0016638	oxidoreductase activity, acting on the CH-NH2 group of donors	0.000318	0.009612	30	4
		GO:0008238	exopeptidase activity	0.00034	0.009653	84	6
		GO:0032450	maltose alpha-glucosidase activity	0.000362	0.009721	3	2
		GO:0052692	raffinose alpha-galactosidase activity	0.000719	0.01737	4	2
		GO:0004557	alpha-galactosidase activity	0.000719	0.01737	4	2
		GO:0015926	glucosidase activity	0.000843	0.018505	137	7
		GO:0009044	xylan 1,4-beta-xylosidase activity	0.000809	0.018505	17	3
		GO:0017171	serine hydrolase activity	0.001012	0.019561	183	8
		GO:0046556	alpha-L-arabinofuranosidase activity	0.000963	0.019561	18	3
		GO:0008236	serine-type peptidase activity	0.001012	0.019561	183	8
		GO:0005507	copper ion binding	0.001222	0.022705	146	7
		GO:0043864	indoleacetamide hydrolase activity	0.001772	0.030568	6	2
		GO:0004558	alpha-1,4-glucosidase activity	0.001772	0.030568	6	2
darkgreen	Biological Process
		Accession	Term_name	p-value	FDR	Background_Count	DE_Count
		GO:0005976	polysaccharide metabolic process	5.25e-17	8.33e-14	579	57
		GO:0044264	cellular polysaccharide metabolic process	1.84e-14	1.03e-11	365	41
		GO:0005975	carbohydrate metabolic process	1.95e-14	1.03e-11	1228	83
		GO:0000271	polysaccharide biosynthetic process	1.22e-12	4.84e-10	260	32
		GO:0071554	cell wall organization or biogenesis	2.16e-12	6.85e-10	720	56
		GO:0044262	cellular carbohydrate metabolic process	4.67e-12	1.24e-09	508	45
		GO:0044042	glucan metabolic process	1.61e-11	3.2e-09	253	30
		GO:0006073	cellular glucan metabolic process	1.46e-11	3.2e-09	252	30
		GO:0071555	cell wall organization	4.87e-11	8.59e-09	649	50
		GO:0045229	external encapsulating structure organization	8.67e-11	1.38e-08	703	52
		GO:0016051	carbohydrate biosynthetic process	9.64e-10	1.39e-07	373	34
		GO:0033692	cellular polysaccharide biosynthetic process	4.04e-09	5.34e-07	211	24
		GO:0045488	pectin metabolic process	5.67e-09	6.92e-07	198	23
		GO:0010393	galacturonan metabolic process	6.88e-09	7.51e-07	200	23
		GO:0010383	cell wall polysaccharide metabolic process	7.1e-09	7.51e-07	184	22
		GO:0045489	pectin biosynthetic process	1.12e-08	1.11e-06	74	14
		GO:0034637	cellular carbohydrate biosynthetic process	1.92e-08	1.79e-06	246	25
		GO:0030243	cellulose metabolic process	2.93e-08	2.59e-06	120	17
		GO:0044036	cell wall macromolecule metabolic process	4.96e-08	4.14e-06	222	23
		GO:0051273	beta-glucan metabolic process	1.53e-07	1.21e-05	134	17
		GO:0042546	cell wall biogenesis	1.21e-06	9.15e-05	172	18
		GO:0010411	xyloglucan metabolic process	4.72e-06	0.000341	60	10
		GO:0009734	auxin-activated signaling pathway	8.2e-06	0.000566	362	26
		GO:0009250	glucan biosynthetic process	9e-06	0.000595	143	15
		GO:0010410	hemicellulose metabolic process	1.32e-05	0.000836	130	14
		GO:0071669	plant-type cell wall organization or biogenesis	2.18e-05	0.001331	252	20
		GO:0070592	cell wall polysaccharide biosynthetic process	2.46e-05	0.001446	87	11
		GO:0030244	cellulose biosynthetic process	3.77e-05	0.002135	91	11
		GO:0016049	cell growth	4.72e-05	0.002585	332	23
		GO:0044247	cellular polysaccharide catabolic process	6.51e-05	0.003443	65	9
		GO:1902600	proton transmembrane transport	7.36e-05	0.003766	66	9
		GO:0070589	cellular component macromolecule biosynthetic process	8.24e-05	0.003965	99	11
		GO:0044038	cell wall macromolecule biosynthetic process	8.24e-05	0.003965	99	11
		GO:0051274	beta-glucan biosynthetic process	0.000118	0.005363	103	11
		GO:0000272	polysaccharide catabolic process	0.000116	0.005363	262	19
		GO:0033481	galacturonate biosynthetic process	0.000194	0.00857	5	3
		GO:0030245	cellulose catabolic process	0.0002	0.008579	32	6
		GO:0044085	cellular component biogenesis	0.00025	0.010428	278	19
		GO:0010143	cutin biosynthetic process	0.000267	0.010879	22	5
		GO:0051275	beta-glucan catabolic process	0.000283	0.011244	34	6
		GO:0006063	uronic acid metabolic process	0.000381	0.014393	6	3
		GO:0019586	galacturonate metabolic process	0.000381	0.014393	6	3
		GO:0006811	ion transport	0.000392	0.014452	666	34
		GO:0060560	developmental growth involved in morphogenesis	0.00048	0.017325	293	19
		GO:0006633	fatty acid biosynthetic process	0.000595	0.020996	207	15
		GO:0006629	lipid metabolic process	0.000626	0.021606	1370	58
		GO:0010601	positive regulation of auxin biosynthetic process	0.000653	0.022051	7	3
		GO:0016052	carbohydrate catabolic process	0.000675	0.022304	374	22
		GO:0072330	monocarboxylic acid biosynthetic process	0.000695	0.022507	326	20
		GO:0009826	unidimensional cell growth	0.000718	0.02278	256	17
		GO:0044275	cellular carbohydrate catabolic process	0.000923	0.028713	92	9
		GO:0040007	growth	0.00101	0.030086	411	23
		GO:0090355	positive regulation of auxin metabolic process	0.001024	0.030086	8	3
		GO:0046886	positive regulation of hormone biosynthetic process	0.001024	0.030086	8	3
		GO:0007017	microtubule-based process	0.001112	0.030963	243	16
		GO:0098660	inorganic ion transmembrane transport	0.001109	0.030963	220	15
		GO:0009664	plant-type cell wall organization	0.001075	0.030963	133	11
		GO:0052546	cell wall pectin metabolic process	0.001208	0.033058	30	5
		GO:0055085	transmembrane transport	0.001341	0.035477	660	32
		GO:0006004	fucose metabolic process	0.001332	0.035477	45	6
		GO:0009630	gravitropism	0.001522	0.039296	80	8
		GO:0009581	detection of external stimulus	0.001609	0.039296	63	7
		GO:0009251	glucan catabolic process	0.001609	0.039296	63	7
		GO:0009582	detection of abiotic stimulus	0.001609	0.039296	63	7
		GO:0007338	single fertilization	0.001539	0.039296	19	4
		GO:0009628	response to abiotic stimulus	0.001637	0.039371	2141	81
		GO:0009653	anatomical structure morphogenesis	0.001688	0.039981	642	31
		GO:0009629	response to gravity	0.001785	0.041662	82	8
		GO:0052325	cell wall pectin biosynthetic process	0.001882	0.043285	20	4
		GO:0009606	tropism	0.00203	0.046023	123	10
		GO:0032352	positive regulation of hormone metabolic process	0.002106	0.046389	10	3
		GO:0009590	detection of gravity	0.002192	0.046389	3	2
		GO:0043622	cortical microtubule organization	0.002157	0.046389	34	5
		GO:0051511	negative regulation of unidimensional cell growth	0.002192	0.046389	3	2
		GO:0042144	vacuole fusion, non-autophagic	0.002192	0.046389	3	2
	Cellular Component	Accession	Term_name	p-value	FDR	Background_Count	DE_Count
		GO:0005794	Golgi apparatus	1.1e-16	2.27e-14	885	72
		GO:0016020	membrane	1.37e-11	1.41e-09	7930	297
		GO:0005576	extracellular region	3.09e-09	2.12e-07	1344	75
		GO:0000139	Golgi membrane	1.59e-07	8.18e-06	524	37
		GO:0005802	trans-Golgi network	5.62e-07	2.32e-05	313	26
		GO:0098791	Golgi apparatus subcompartment	2.13e-06	7.32e-05	336	26
		GO:0031984	organelle subcompartment	7.08e-06	0.000208	359	26
		GO:0005773	vacuole	2.08e-05	0.000536	621	36
		GO:0005886	plasma membrane	4.1e-05	0.000938	3644	137
		GO:0033179	proton-transporting V-type ATPase, V0 domain	0.000101	0.001792	10	4
		GO:0005618	cell wall	0.000104	0.001792	858	43
		GO:0005768	endosome	0.000102	0.001792	420	26
		GO:0005774	vacuolar membrane	0.000121	0.001924	625	34
		GO:0030312	external encapsulating structure	0.000145	0.002137	871	43
		GO:0005874	microtubule	0.000164	0.002256	247	18
		GO:0042807	central vacuole	0.000194	0.002503	5	3
		GO:0099513	polymeric cytoskeletal fiber	0.000268	0.003244	257	18
		GO:0098588	bounding membrane of organelle	0.000296	0.003387	2020	81
		GO:0099081	supramolecular polymer	0.00037	0.003815	264	18
		GO:0099512	supramolecular fiber	0.00037	0.003815	264	18
		GO:0000325	plant-type vacuole	0.000479	0.004622	102	10
		GO:0009506	plasmodesma	0.000494	0.004622	923	43
		GO:0009505	plant-type cell wall	0.000544	0.004872	296	19
		GO:0005911	cell-cell junction	0.000588	0.005047	931	43
		GO:0070161	anchoring junction	0.000627	0.00517	934	43
		GO:0030054	cell junction	0.000736	0.005832	970	44
		GO:0016471	vacuolar proton-transporting V-type ATPase complex	0.001024	0.007532	8	3
		GO:0033176	proton-transporting V-type ATPase complex	0.001024	0.007532	8	3
		GO:0000326	protein storage vacuole	0.001241	0.008817	18	4
		GO:0048046	apoplast	0.001565	0.010747	425	23
		GO:0097708	intracellular vesicle	0.001914	0.01195	565	28
		GO:0000322	storage vacuole	0.001882	0.01195	20	4
		GO:0031410	cytoplasmic vesicle	0.001819	0.01195	563	28
		GO:0031982	vesicle	0.002204	0.013355	598	29
		GO:0005856	cytoskeleton	0.003977	0.023407	157	11
		GO:0031090	organelle membrane	0.004289	0.023969	3134	109
		GO:0010330	cellulose synthase complex	0.004305	0.023969	4	2
		GO:0016469	proton-transporting two-sector ATPase complex	0.004721	0.025595	13	3
		GO:0009705	plant-type vacuole membrane	0.00865	0.044801	151	10
		GO:0009898	cytoplasmic side of plasma membrane	0.008699	0.044801	16	3
		GO:0098562	cytoplasmic side of membrane	0.010352	0.050902	17	3
		GO:0000220	vacuolar proton-transporting V-type ATPase, V0 domain	0.010378	0.050902	6	2
		GO:0098552	side of membrane	0.012021	0.057589	33	4
		GO:0032580	Golgi cisterna membrane	0.016233	0.075999	36	4
		GO:0005764	lysosome	0.018163	0.083148	56	5
		GO:0099080	supramolecular complex	0.022434	0.100465	391	18
		GO:0033180	proton-transporting V-type ATPase, V1 domain	0.023591	0.102554	9	2
		GO:0005881	cytoplasmic microtubule	0.023896	0.102554	23	3
		GO:0071563	Myo2p-Vac17p-Vac8p transport complex	0.027302	0.11028	1	1
		GO:0000323	lytic vacuole	0.026972	0.11028	62	5
		GO:0009341	beta-galactosidase complex	0.027302	0.11028	1	1
		GO:0033177	proton-transporting two-sector ATPase complex, proton-transporting domain	0.033936	0.134439	45	4
	Molecular Function
		Accession	Term_name	p-value	FDR	Background_Count	DE_Count
		GO:0015250	water channel activity	5.67e-09	1.88e-06	31	10
		GO:0005372	water transmembrane transporter activity	5.67e-09	1.88e-06	31	10
		GO:0015318	inorganic molecular entity transmembrane transporter activity	7.71e-08	1.37e-05	738	47
		GO:0016746	acyltransferase activity	1.03e-07	1.37e-05	515	37
		GO:0016747	acyltransferase activity, transferring groups other than amino-acyl groups	8.69e-08	1.37e-05	468	35
		GO:0008374	O-acyltransferase activity	5.31e-07	5.88e-05	146	17
		GO:0046961	proton-transporting ATPase activity, rotational mechanism	1.83e-06	0.000135	23	7
		GO:0044769	ATPase activity, coupled to transmembrane movement of ions, rotational mechanism	1.83e-06	0.000135	23	7
		GO:0042625	ATPase-coupled ion transmembrane transporter activity	1.83e-06	0.000135	23	7
		GO:0016407	acetyltransferase activity	3.21e-06	0.000213	166	17
		GO:0016413	O-acetyltransferase activity	4.23e-06	0.000234	87	12
		GO:0005215	transporter activity	4.2e-06	0.000234	1556	73
		GO:0022857	transmembrane transporter activity	8.48e-06	0.000433	1474	69
		GO:0102336	3-oxo-arachidoyl-CoA synthase activity	2.08e-05	0.00069	22	6
		GO:0015200	methylammonium transmembrane transporter activity	2.03e-05	0.00069	3	3
		GO:0005275	amine transmembrane transporter activity	2.03e-05	0.00069	3	3
		GO:0102338	3-oxo-lignoceronyl-CoA synthase activity	2.08e-05	0.00069	22	6
		GO:0047262	polygalacturonate 4-alpha-galacturonosyltransferase activity	1.63e-05	0.00069	31	7
		GO:0102756	very-long-chain 3-ketoacyl-CoA synthase activity	2.08e-05	0.00069	22	6
		GO:0102337	3-oxo-cerotoyl-CoA synthase activity	2.08e-05	0.00069	22	6
		GO:0022853	active ion transmembrane transporter activity	3.4e-05	0.001074	325	23
		GO:0015075	ion transmembrane transporter activity	4.62e-05	0.001393	801	42
		GO:0005200	structural constituent of cytoskeleton	0.000129	0.003711	42	7
		GO:0008810	cellulase activity	0.000166	0.004601	31	6
		GO:0009678	pyrophosphate hydrolysis-driven proton transmembrane transporter activity	0.000174	0.004626	44	7
		GO:0016762	xyloglucan:xyloglucosyl transferase activity	0.0002	0.005108	32	6
		GO:0004553	hydrolase activity, hydrolyzing O-glycosyl compounds	0.000321	0.007891	427	25
		GO:0090447	glycerol-3-phosphate 2-O-acyltransferase activity	0.000381	0.009033	6	3
		GO:0008324	cation transmembrane transporter activity	0.000491	0.011246	621	32
		GO:0016798	hydrolase activity, acting on glycosyl bonds	0.000657	0.014533	474	26
		GO:0022832	voltage-gated channel activity	0.000712	0.014774	55	7
		GO:0005244	voltage-gated ion channel activity	0.000712	0.014774	55	7
		GO:0102419	sn-2-glycerol-3-phosphate omega-OH-C22:0-CoA acyl transferase activity	0.000744	0.014975	2	2
		GO:0015267	channel activity	0.000837	0.015882	283	18
		GO:0022803	passive transmembrane transporter activity	0.000837	0.015882	283	18
		GO:0019829	ATPase-coupled cation transmembrane transporter activity	0.000983	0.018136	58	7
		GO:0022890	inorganic cation transmembrane transporter activity	0.0012	0.021537	574	29
		GO:0102985	delta12-fatty-acid desaturase activity	0.001504	0.025615	9	3
		GO:0050378	UDP-glucuronate 4-epimerase activity	0.001504	0.025615	9	3
		GO:0022804	active transmembrane transporter activity	0.001712	0.028415	726	34
		GO:0016757	glycosyltransferase activity	0.002122	0.034364	764	35
		GO:0016717	oxidoreductase activity, acting on paired donors, with oxidation of a pair of donors resulting in the reduction of molecular oxygen to two molecules of water	0.00246	0.037993	35	5
		GO:0016857	racemase and epimerase activity, acting on carbohydrates and derivatives	0.00246	0.037993	35	5
		GO:0015294	solute:cation symporter activity	0.002663	0.040184	149	11
		GO:0015078	proton transmembrane transporter activity	0.003308	0.048818	372	20
grey60	Biological Process
		Accession	Term_name	p-value	FDR	Background_Count	DE_Count
		GO:1900674	olefin biosynthetic process	9.02e-07	8.81e-05	46	6
		GO:1900673	olefin metabolic process	9.02e-07	8.81e-05	46	6
		GO:0006952	defense response	1.68e-07	8.81e-05	1992	36
		GO:0043449	cellular alkene metabolic process	6.88e-07	8.81e-05	44	6
		GO:0043450	alkene biosynthetic process	6.88e-07	8.81e-05	44	6
		GO:0009692	ethylene metabolic process	6.88e-07	8.81e-05	44	6
		GO:0009693	ethylene biosynthetic process	6.88e-07	8.81e-05	44	6
		GO:0002237	response to molecule of bacterial origin	1.1e-05	0.000937	70	6
		GO:0120251	hydrocarbon biosynthetic process	1.4e-05	0.001063	73	6
		GO:0120252	hydrocarbon metabolic process	2.92e-05	0.001666	83	6
		GO:0009835	fruit ripening	2.73e-05	0.001666	82	6
		GO:0009607	response to biotic stimulus	2.7e-05	0.001666	1511	26
		GO:0006950	response to stress	4.11e-05	0.002164	4166	51
		GO:0006026	aminoglycan catabolic process	6.82e-05	0.002592	31	4
		GO:0006030	chitin metabolic process	6.82e-05	0.002592	31	4
		GO:0006032	chitin catabolic process	6.82e-05	0.002592	31	4
		GO:0046348	amino sugar catabolic process	6.82e-05	0.002592	31	4
		GO:1901072	glucosamine-containing compound catabolic process	6.82e-05	0.002592	31	4
		GO:1901071	glucosamine-containing compound metabolic process	7.75e-05	0.002791	32	4
		GO:0120255	olefinic compound biosynthetic process	9.33e-05	0.003189	102	6
		GO:0080142	regulation of salicylic acid biosynthetic process	0.000153	0.004995	15	3
		GO:0009617	response to bacterium	0.000183	0.005701	554	13
		GO:0120254	olefinic compound metabolic process	0.000228	0.006769	120	6
		GO:0010565	regulation of cellular ketone metabolic process	0.000284	0.00809	125	6
		GO:0010083	regulation of vegetative meristem growth	0.000299	0.008177	45	4
		GO:0010337	regulation of salicylic acid metabolic process	0.000326	0.008563	46	4
		GO:0006040	amino sugar metabolic process	0.000384	0.009724	48	4
		GO:0005998	xylulose catabolic process	0.000501	0.010711	5	2
		GO:0048439	flower morphogenesis	0.000449	0.010711	50	4
		GO:0006022	aminoglycan metabolic process	0.000485	0.010711	51	4
		GO:0052317	camalexin metabolic process	0.000501	0.010711	5	2
		GO:0010120	camalexin biosynthetic process	0.000501	0.010711	5	2
		GO:0010075	regulation of meristem growth	0.000551	0.011414	93	5
		GO:0009620	response to fungus	0.000609	0.011892	398	10
		GO:0071695	anatomical structure maturation	0.000603	0.011892	144	6
		GO:1905613	regulation of developmental vegetative growth	0.000741	0.012183	57	4
		GO:0050832	defense response to fungus	0.000653	0.012183	331	9
		GO:0052315	phytoalexin biosynthetic process	0.000748	0.012183	6	2
		GO:0009700	indole phytoalexin biosynthetic process	0.000748	0.012183	6	2
		GO:0046217	indole phytoalexin metabolic process	0.000748	0.012183	6	2
		GO:0005997	xylulose metabolic process	0.000748	0.012183	6	2
		GO:0052314	phytoalexin metabolic process	0.000748	0.012183	6	2
		GO:0062012	regulation of small molecule metabolic process	0.000774	0.01231	151	6
		GO:0010016	shoot system morphogenesis	0.001216	0.018897	65	4
		GO:0042742	defense response to bacterium	0.001613	0.024515	453	10
		GO:0019323	pentose catabolic process	0.00177	0.025763	9	2
		GO:0009403	toxin biosynthetic process	0.00177	0.025763	9	2
		GO:0010540	basipetal auxin transport	0.001986	0.027727	35	3
		GO:0010015	root morphogenesis	0.001966	0.027727	74	4
		GO:0021700	developmental maturation	0.002071	0.028332	183	6
		GO:0098542	defense response to other organism	0.002144	0.028755	1187	18
		GO:0045926	negative regulation of growth	0.002274	0.028804	77	4
		GO:0010380	regulation of chlorophyll biosynthetic process	0.002274	0.028804	77	4
		GO:1901463	regulation of tetrapyrrole biosynthetic process	0.002274	0.028804	77	4
		GO:0090056	regulation of chlorophyll metabolic process	0.002497	0.028949	79	4
		GO:1901136	carbohydrate derivative catabolic process	0.002384	0.028949	78	4
		GO:0009690	cytokinin metabolic process	0.002497	0.028949	79	4
		GO:1901401	regulation of tetrapyrrole metabolic process	0.002497	0.028949	79	4
		GO:0050896	response to stimulus	0.002337	0.028949	5777	58
		GO:0051707	response to other organism	0.0027	0.030784	1412	20
		GO:0043207	response to external biotic stimulus	0.003535	0.039638	1446	20
		GO:0009411	response to UV	0.003699	0.040808	143	5
		GO:0044419	biological process involved in interspecies interaction between organisms	0.004508	0.048947	1478	20
	Cellular Component	Accession	Term_name	p-value	FDR	Background_Count	DE_Count
		GO:0005615	extracellular space	0.000114	0.007792	152	7
		GO:0005740	mitochondrial envelope	0.000188	0.007792	16	3
	Molecular Function	Accession	Term_name	p-value	FDR	Background_Count	DE_Count
		GO:0050275	scopoletin glucosyltransferase activity	3.09e-07	9.2e-05	9	4
		GO:0004568	chitinase activity	5.21e-05	0.007483	29	4
		GO:0016847	1-aminocyclopropane-1-carboxylate synthase activity	7.53e-05	0.007483	12	3
		GO:0008061	chitin binding	0.000124	0.009254	36	4
		GO:0005516	calmodulin binding	0.000176	0.00934	340	10
		GO:0035251	UDP-glucosyltransferase activity	0.000188	0.00934	279	9
		GO:0102721	ubiquinol:oxygen oxidoreductase activity	0.000501	0.011487	5	2
		GO:0050403	trans-zeatin O-beta-D-glucosyltransferase activity	0.000326	0.011487	46	4
		GO:0009916	alternative oxidase activity	0.000501	0.011487	5	2
		GO:0008999	peptide-alanine-alpha-N-acetyltransferase activity	0.000302	0.011487	4	2
		GO:0046527	glucosyltransferase activity	0.000479	0.011487	317	9
		GO:0044105	L-xylulose reductase (NAD+) activity	0.000501	0.011487	5	2
		GO:0050038	L-xylulose reductase (NADP+) activity	0.000501	0.011487	5	2
		GO:0050404	zeatin O-beta-D-xylosyltransferase activity	0.000603	0.012845	54	4
		GO:0008194	UDP-glycosyltransferase activity	0.000885	0.017579	418	10
		GO:0035252	UDP-xylosyltransferase activity	0.001287	0.023968	66	4
		GO:0016763	pentosyltransferase activity	0.001668	0.029239	119	5
		GO:0004090	carbonyl reductase (NADPH) activity	0.00177	0.029308	9	2
		GO:0042285	xylosyltransferase activity	0.00187	0.029326	73	4
		GO:0022804	active transmembrane transporter activity	0.002221	0.033091	726	13
		GO:0042973	glucan endo-1,3-beta-D-glucosidase activity	0.002497	0.035435	79	4
		GO:0004596	peptide alpha-N-acetyltransferase activity	0.002679	0.036292	11	2
		GO:0005355	glucose transmembrane transporter activity	0.0032	0.039734	12	2
		GO:0015149	hexose transmembrane transporter activity	0.0032	0.039734	12	2
		GO:0004553	hydrolase activity, hydrolyzing O-glycosyl compounds	0.003714	0.044272	427	9
		GO:0005388	P-type calcium transporter activity	0.00502	0.053425	15	2
		GO:0019842	vitamin binding	0.004788	0.053425	217	6
		GO:0022821	solute:potassium antiporter activity	0.00502	0.053425	15	2
		GO:0008843	endochitinase activity	0.007151	0.067351	1	1
		GO:0035885	exochitinase activity	0.007151	0.067351	1	1
		GO:0016798	hydrolase activity, acting on glycosyl bonds	0.007232	0.067351	474	9
		GO:0016846	carbon-sulfur lyase activity	0.007174	0.067351	55	3
		GO:0031418	L-ascorbic acid binding	0.007919	0.070323	57	3
		GO:0015145	monosaccharide transmembrane transporter activity	0.008023	0.070323	19	2
		GO:0004364	glutathione transferase activity	0.008708	0.074138	59	3
		GO:0016757	glycosyltransferase activity	0.008986	0.074387	764	12
		GO:0016758	hexosyltransferase activity	0.010363	0.083465	592	10
		GO:0008422	beta-glucosidase activity	0.011214	0.087944	121	4
		GO:0004516	nicotinate phosphoribosyltransferase activity	0.01425	0.108887	2	1
		GO:0016410	N-acyltransferase activity	0.015496	0.115445	73	3
		GO:0015926	glucosidase activity	0.016992	0.122733	137	4
		GO:0015291	secondary active transmembrane transporter activity	0.017298	0.122733	457	8
		GO:0140828	metal cation:monoatomic cation antiporter activity	0.018182	0.124364	29	2
		GO:0042626	ATPase-coupled transmembrane transporter activity	0.018362	0.124364	212	5
		GO:0052862	glucan endo-1,4-beta-glucanase activity, C-3 substituted reducing group	0.0213	0.129537	3	1
		GO:0052861	glucan endo-1,3-beta-glucanase activity, C-3 substituted reducing group	0.0213	0.129537	3	1
		GO:0004514	nicotinate-nucleotide diphosphorylase (carboxylating) activity	0.0213	0.129537	3	1
		GO:0050291	sphingosine N-acyltransferase activity	0.0213	0.129537	3	1
		GO:0048029	monosaccharide binding	0.019745	0.129537	80	3
		GO:0042802	identical protein binding	0.022438	0.133013	480	8
		GO:0015662	P-type ion transporter activity	0.02321	0.133013	33	2
		GO:0140358	P-type transmembrane transporter activity	0.02321	0.133013	33	2
		GO:0008686	3,4-dihydroxy-2-butanone-4-phosphate synthase activity	0.028299	0.133858	4	1
		GO:0008977	prephenate dehydrogenase (NAD+) activity	0.028299	0.133858	4	1
		GO:0030414	peptidase inhibitor activity	0.027593	0.133858	91	3
		GO:0033731	arogenate dehydrogenase [NAD(P)+] activity	0.028299	0.133858	4	1
		GO:0033730	arogenate dehydrogenase (NADP+) activity	0.028299	0.133858	4	1
		GO:0003935	GTP cyclohydrolase II activity	0.028299	0.133858	4	1
		GO:0004665	prephenate dehydrogenase (NADP+) activity	0.028299	0.133858	4	1
		GO:0016887	ATP hydrolysis activity	0.025045	0.133858	230	5
		GO:0003933	GTP cyclohydrolase activity	0.028299	0.133858	4	1
		GO:0004866	endopeptidase inhibitor activity	0.027593	0.133858	91	3
		GO:0016717	oxidoreductase activity, acting on paired donors, with oxidation of a pair of donors resulting in the reduction of molecular oxygen to two molecules of water	0.025914	0.133858	35	2
		GO:0061135	endopeptidase regulator activity	0.029174	0.135839	93	3
		GO:0022853	active ion transmembrane transporter activity	0.029716	0.136237	325	6
		GO:0061134	peptidase regulator activity	0.031632	0.142825	96	3
		GO:0005358	high-affinity glucose:proton symporter activity	0.035248	0.147944	5	1
		GO:0015591	D-ribose transmembrane transporter activity	0.035248	0.147944	5	1
		GO:0015576	sorbitol transmembrane transporter activity	0.035248	0.147944	5	1
		GO:0015575	mannitol transmembrane transporter activity	0.035248	0.147944	5	1
		GO:0015148	D-xylose transmembrane transporter activity	0.035248	0.147944	5	1
		GO:0016818	hydrolase activity, acting on acid anhydrides, in phosphorus-containing anhydrides	0.042234	0.150209	544	8
		GO:0009679	hexose:proton symporter activity	0.042148	0.150209	6	1
		GO:0031406	carboxylic acid binding	0.039639	0.150209	105	3
		GO:0034212	peptide N-acetyltransferase activity	0.039523	0.150209	44	2
		GO:0015146	pentose transmembrane transporter activity	0.042148	0.150209	6	1
		GO:0047874	dolichyldiphosphatase activity	0.042148	0.150209	6	1
		GO:0043177	organic acid binding	0.039639	0.150209	105	3
		GO:0005351	carbohydrate:proton symporter activity	0.042845	0.150209	46	2
		GO:0005354	galactose transmembrane transporter activity	0.042148	0.150209	6	1
		GO:0080030	methyl indole-3-acetate esterase activity	0.041171	0.150209	45	2
		GO:0005402	carbohydrate:cation symporter activity	0.042845	0.150209	46	2
		GO:0016462	pyrophosphatase activity	0.041857	0.150209	543	8
		GO:0015168	glycerol transmembrane transporter activity	0.042148	0.150209	6	1
		GO:0005356	glucose:proton symporter activity	0.042148	0.150209	6	1
		GO:0015399	primary active transmembrane transporter activity	0.043804	0.151785	268	5
		GO:0016817	hydrolase activity, acting on acid anhydrides	0.044542	0.15257	550	8
		GO:0051119	sugar transmembrane transporter activity	0.046267	0.156677	48	2
		GO:0010328	auxin influx transmembrane transporter activity	0.048999	0.157009	7	1
		GO:0017111	ribonucleoside triphosphate phosphatase activity	0.04739	0.157009	459	7
		GO:0016715	oxidoreductase activity, acting on paired donors, with incorporation or reduction of molecular oxygen, reduced ascorbate as one donor, and incorporation of one atom of oxygen	0.048999	0.157009	7	1
		GO:0009815	1-aminocyclopropane-1-carboxylate oxidase activity	0.048999	0.157009	7	1
		GO:0052736	beta-glucanase activity	0.048999	0.157009	7	1
paleturquoise
	Biological Process	Accession	Term_name	p-value	FDR	Background_Count	DE_Count
		GO:0043436	oxoacid metabolic process	2.79e-11	8.54e-09	1269	22
		GO:0019752	carboxylic acid metabolic process	3.97e-11	8.54e-09	1160	21
		GO:0044281	small molecule metabolic process	3e-11	8.54e-09	2014	27
		GO:0006082	organic acid metabolic process	5.48e-11	8.83e-09	1314	22
		GO:1901605	alpha-amino acid metabolic process	8.94e-10	1.15e-07	347	12
		GO:0006753	nucleoside phosphate metabolic process	1.56e-09	1.44e-07	452	13
		GO:0009117	nucleotide metabolic process	1.48e-09	1.44e-07	450	13
		GO:0006520	amino acid metabolic process	3.06e-09	2.47e-07	478	13
		GO:1901607	alpha-amino acid biosynthetic process	2.12e-08	1.36e-06	210	9
		GO:0055086	nucleobase-containing small molecule metabolic process	1.93e-08	1.36e-06	558	13
		GO:0008652	amino acid biosynthetic process	5.18e-08	3.04e-06	233	9
		GO:0009084	glutamine family amino acid biosynthetic process	7.14e-08	3.84e-06	34	5
		GO:0019637	organophosphate metabolic process	1.07e-07	5.32e-06	767	14
		GO:0044283	small molecule biosynthetic process	2.97e-07	1.37e-05	834	14
		GO:0009064	glutamine family amino acid metabolic process	5.31e-07	2.28e-05	94	6
		GO:0046394	carboxylic acid biosynthetic process	7.58e-07	3.05e-05	642	12
		GO:0016053	organic acid biosynthetic process	1.43e-06	5.41e-05	682	12
		GO:0006163	purine nucleotide metabolic process	2.61e-06	9.36e-05	372	9
		GO:0072521	purine-containing compound metabolic process	4.62e-06	0.000157	399	9
		GO:0006526	arginine biosynthetic process	6.55e-06	0.000211	12	3
		GO:1901564	organonitrogen compound metabolic process	8.56e-06	0.000263	4825	32
		GO:1901135	carbohydrate derivative metabolic process	1.61e-05	0.000467	723	11
		GO:0009259	ribonucleotide metabolic process	1.67e-05	0.000467	356	8
		GO:0019693	ribose phosphate metabolic process	1.81e-05	0.000485	360	8
		GO:0006525	arginine metabolic process	2.4e-05	0.000618	18	3
		GO:0009058	biosynthetic process	2.57e-05	0.000637	3405	25
		GO:0009130	pyrimidine nucleoside monophosphate biosynthetic process	2.84e-05	0.000678	19	3
		GO:1901576	organic substance biosynthetic process	3.36e-05	0.000774	3234	24
		GO:0009129	pyrimidine nucleoside monophosphate metabolic process	3.88e-05	0.000863	21	3
		GO:0009066	aspartate family amino acid metabolic process	6.82e-05	0.001466	69	4
		GO:0006790	sulfur compound metabolic process	8.82e-05	0.001834	333	7
		GO:0055129	L-proline biosynthetic process	9.81e-05	0.001978	5	2
		GO:1901615	organic hydroxy compound metabolic process	0.000112	0.002186	346	7
		GO:0006090	pyruvate metabolic process	0.000122	0.002306	80	4
		GO:0044205	'de novo' UMP biosynthetic process	0.000147	0.002706	6	2
		GO:0006796	phosphate-containing compound metabolic process	0.00018	0.002969	1657	15
		GO:0046496	nicotinamide nucleotide metabolic process	0.000169	0.002969	34	3
		GO:0090407	organophosphate biosynthetic process	0.000175	0.002969	498	8
		GO:1901566	organonitrogen compound biosynthetic process	0.000179	0.002969	1287	13
		GO:0019362	pyridine nucleotide metabolic process	0.000201	0.003245	36	3
		GO:1901362	organic cyclic compound biosynthetic process	0.000223	0.003512	1316	13
		GO:0006221	pyrimidine nucleotide biosynthetic process	0.000256	0.003837	39	3
		GO:0006793	phosphorus metabolic process	0.000251	0.003837	1709	15
		GO:0043648	dicarboxylic acid metabolic process	0.000266	0.003899	98	4
		GO:0072524	pyridine-containing compound metabolic process	0.000297	0.004257	41	3
		GO:0019682	glyceraldehyde-3-phosphate metabolic process	0.00035	0.004807	9	2
		GO:0006561	proline biosynthetic process	0.00035	0.004807	9	2
		GO:0044249	cellular biosynthetic process	0.00039	0.005242	3069	21
		GO:0006220	pyrimidine nucleotide metabolic process	0.000474	0.006244	48	3
		GO:0006541	glutamine metabolic process	0.000535	0.006903	50	3
		GO:0071704	organic substance metabolic process	0.000552	0.006975	9691	45
		GO:0006091	generation of precursor metabolites and energy	0.000652	0.007651	333	6
		GO:0009150	purine ribonucleotide metabolic process	0.000642	0.007651	332	6
		GO:0006560	proline metabolic process	0.000638	0.007651	12	2
		GO:0044238	primary metabolic process	0.000636	0.007651	8826	42
		GO:0072528	pyrimidine-containing compound biosynthetic process	0.000671	0.007729	54	3
		GO:0046451	diaminopimelate metabolic process	0.000753	0.008372	13	2
		GO:0009089	lysine biosynthetic process via diaminopimelate	0.000753	0.008372	13	2
		GO:0009124	nucleoside monophosphate biosynthetic process	0.000786	0.008452	57	3
		GO:0032787	monocarboxylic acid metabolic process	0.000783	0.008452	624	8
		GO:0006222	UMP biosynthetic process	0.000876	0.008697	14	2
		GO:0008202	steroid metabolic process	0.000868	0.008697	134	4
		GO:0009174	pyrimidine ribonucleoside monophosphate biosynthetic process	0.000876	0.008697	14	2
		GO:0045037	protein import into chloroplast stroma	0.000876	0.008697	14	2
		GO:0046049	UMP metabolic process	0.000876	0.008697	14	2
		GO:0046031	ADP metabolic process	0.001005	0.008758	62	3
		GO:0009179	purine ribonucleoside diphosphate metabolic process	0.001005	0.008758	62	3
		GO:0009185	ribonucleoside diphosphate metabolic process	0.001005	0.008758	62	3
		GO:0006096	glycolytic process	0.001005	0.008758	62	3
		GO:0009135	purine nucleoside diphosphate metabolic process	0.001005	0.008758	62	3
		GO:0006757	ATP generation from ADP	0.001005	0.008758	62	3
		GO:1901360	organic cyclic compound metabolic process	0.000955	0.008758	3762	23
		GO:0006165	nucleoside diphosphate phosphorylation	0.001005	0.008758	62	3
		GO:0009123	nucleoside monophosphate metabolic process	0.000958	0.008758	61	3
		GO:0009132	nucleoside diphosphate metabolic process	0.001153	0.009656	65	3
		GO:0009085	lysine biosynthetic process	0.001151	0.009656	16	2
		GO:0009173	pyrimidine ribonucleoside monophosphate metabolic process	0.001151	0.009656	16	2
		GO:0046939	nucleotide phosphorylation	0.00137	0.01133	69	3
		GO:0006553	lysine metabolic process	0.001462	0.011934	18	2
		GO:0044272	sulfur compound biosynthetic process	0.001633	0.013167	159	4
		GO:0009165	nucleotide biosynthetic process	0.002007	0.015599	282	5
		GO:0006739	NADP metabolic process	0.001994	0.015599	21	2
		GO:0018130	heterocycle biosynthetic process	0.001992	0.015599	1075	10
		GO:1901293	nucleoside phosphate biosynthetic process	0.002102	0.016138	285	5
		GO:0008152	metabolic process	0.002211	0.016391	10558	46
		GO:0046483	heterocycle metabolic process	0.002193	0.016391	3501	21
		GO:0072527	pyrimidine-containing compound metabolic process	0.002172	0.016391	81	3
		GO:0035383	thioester metabolic process	0.002491	0.018055	85	3
		GO:0006637	acyl-CoA metabolic process	0.002491	0.018055	85	3
		GO:0009218	pyrimidine ribonucleotide metabolic process	0.002605	0.018461	24	2
		GO:0009220	pyrimidine ribonucleotide biosynthetic process	0.002605	0.018461	24	2
		GO:0046166	glyceraldehyde-3-phosphate biosynthetic process	0.003164	0.020611	1	1
		GO:0033539	fatty acid beta-oxidation using acyl-CoA dehydrogenase	0.003164	0.020611	1	1
		GO:0046073	dTMP metabolic process	0.003164	0.020611	1	1
		GO:0010157	response to chlorate	0.003164	0.020611	1	1
		GO:0042040	metal incorporation into metallo-molybdopterin complex	0.003164	0.020611	1	1
		GO:0018315	molybdenum incorporation into molybdenum-molybdopterin complex	0.003164	0.020611	1	1
		GO:0006231	dTMP biosynthetic process	0.003164	0.020611	1	1
		GO:0006592	ornithine biosynthetic process	0.003164	0.020611	1	1
		GO:0045036	protein targeting to chloroplast	0.003538	0.022594	28	2
		GO:0072596	establishment of protein localization to chloroplast	0.003538	0.022594	28	2
		GO:0006629	lipid metabolic process	0.003708	0.02345	1370	11
		GO:0006807	nitrogen compound metabolic process	0.004062	0.024954	7190	34
		GO:0008610	lipid biosynthetic process	0.004002	0.024954	810	8
		GO:0072598	protein localization to chloroplast	0.004055	0.024954	30	2
		GO:0033875	ribonucleoside bisphosphate metabolic process	0.00452	0.026996	105	3
		GO:0033865	nucleoside bisphosphate metabolic process	0.00452	0.026996	105	3
		GO:0034032	purine nucleoside bisphosphate metabolic process	0.00452	0.026996	105	3
	Cellular Component	Accession	Term_name	p-value	FDR	Background_Count	DE_Count
		GO:0009570	chloroplast stroma	1.2e-08	7.46e-07	536	13
		GO:0009532	plastid stroma	1.31e-08	7.46e-07	540	13
		GO:0005951	carbamoyl-phosphate synthase complex	9.87e-06	0.000375	2	2
		GO:0009526	plastid envelope	7.34e-05	0.001674	439	8
		GO:0009941	chloroplast envelope	6.67e-05	0.001674	433	8
		GO:0009507	chloroplast	9.04e-05	0.001717	1939	17
		GO:0009536	plastid	0.000141	0.002299	2011	17
		GO:0031967	organelle envelope	0.000291	0.003687	537	8
		GO:0031975	envelope	0.000291	0.003687	537	8
		GO:0005739	mitochondrion	0.001918	0.021865	1258	11
		GO:0010006	Toc complex	0.003164	0.026177	1	1
		GO:0009706	chloroplast inner membrane	0.003023	0.026177	91	3
		GO:0009528	plastid inner membrane	0.003215	0.026177	93	3
		GO:0034451	centriolar satellite	0.003164	0.026177	1	1
	Molecular Function
		Accession	Term_name	p-value	FDR	Background_Count	DE_Count
		GO:0004088	carbamoyl-phosphate synthase (glutamine-hydrolyzing) activity	9.87e-06	0.002675	2	2
		GO:0003824	catalytic activity	0.000217	0.029426	11269	51
		GO:0019202	amino acid kinase activity	0.00035	0.031645	9	2
		GO:0016774	phosphotransferase activity, carboxyl group as acceptor	0.000638	0.043245	12	2
		GO:0016646	oxidoreductase activity, acting on the CH-NH group of donors, NAD or NADP as acceptor	0.000876	0.045123	14	2
		GO:0052629	phosphatidylinositol-3,5-bisphosphate 3-phosphatase activity	0.003164	0.045123	1	1
		GO:0016229	steroid dehydrogenase activity	0.00163	0.045123	19	2
		GO:0016407	acetyltransferase activity	0.001911	0.045123	166	4
		GO:0004358	glutamate N-acetyltransferase activity	0.003164	0.045123	1	1
		GO:0061598	molybdopterin adenylyltransferase activity	0.003164	0.045123	1	1
		GO:0061599	molybdopterin molybdotransferase activity	0.003164	0.045123	1	1
		GO:0008987	quinolinate synthetase A activity	0.003164	0.045123	1	1
		GO:0004799	thymidylate synthase activity	0.003164	0.045123	1	1
		GO:0047641	aldose-6-phosphate reductase (NADPH) activity	0.003164	0.045123	1	1
		GO:0042803	protein homodimerization activity	0.001247	0.045123	253	5
		GO:0106099	2-keto-3-deoxy-L-rhamnonate aldolase activity	0.003164	0.045123	1	1
		GO:0016884	carbon-nitrogen ligase activity, with glutamine as amido-N-donor	0.001462	0.045123	18	2
		GO:0042083	5,10-methylenetetrahydrofolate-dependent methyltransferase activity	0.003164	0.045123	1	1
		GO:0004438	phosphatidylinositol-3-phosphate phosphatase activity	0.003164	0.045123	1	1
		GO:0016747	acyltransferase activity, transferring groups other than amino-acyl groups	0.003648	0.049434	468	6

## Sheet: Table S4
Table S4. KEGG pathways of four target modules.
Module	Pathway-id	KEGG pathway	Cluster gene number	P-value	Q-value
steelblue	Phenylalanine metabolism	map00360	7	8e-07	0.000114
	Glycine, serine and threonine metabolism	map00260	6	9.67e-05	0.003595
	Isoquinoline alkaloid biosynthesis	map00950	5	0.000101	0.003595
	Tyrosine metabolism	map00350	5	0.000195	0.005577
	Tropane, piperidine and pyridine alkaloid biosynthesis	map00960	5	0.000486	0.011594
	Amino sugar and nucleotide sugar metabolism	map00520	7	0.000798	0.016302
	Biosynthesis of nucleotide sugars	map01250	6	0.001374	0.024561
	Glycosphingolipid biosynthesis - globo and isoglobo series	map00603	2	0.001949	0.025652
	Thiamine metabolism	map00730	3	0.001734	0.025652
	Citrate cycle (TCA cycle)	map00020	4	0.0026	0.030987
	Tryptophan metabolism	map00380	5	0.002964	0.032604
	Starch and sucrose metabolism	map00500	6	0.004647	0.04747
	beta-Alanine metabolism	map00410	4	0.005046	0.048108
	2-Oxocarboxylic acid metabolism	map01210	4	0.011555	0.10327
	Galactose metabolism	map00052	3	0.015165	0.127564
	Arginine and proline metabolism	map00330	3	0.028334	0.219391
	Biosynthesis of cofactors	map01240	7	0.02915	0.219391
	Glycerolipid metabolism	map00561	3	0.039621	0.269799
	Phagosome	map04145	3	0.039621	0.269799
	Pyruvate metabolism	map00620	4	0.04692	0.304981
darkgreen	Ascorbate and aldarate metabolism	map00053	12	1.31e-07	1.88e-05
	Amino sugar and nucleotide sugar metabolism	map00520	11	0.000156	0.007417
	Fatty acid elongation	map00062	6	0.000226	0.008072
	Biosynthesis of nucleotide sugars	map01250	9	0.000547	0.013213
	Phagosome	map04145	7	0.000554	0.013213
	Biosynthesis of cofactors	map01240	12	0.011733	0.230268
	Glycerolipid metabolism	map00561	5	0.014492	0.230268
	Plant-pathogen interaction	map04626	13	0.013536	0.230268
	Folate biosynthesis	map00790	3	0.019372	0.277022
	Aflatoxin biosynthesis	map00254	1	0.022297	0.289865
	Other glycan degradation	map00511	2	0.028136	0.317589
	Plant hormone signal transduction	map04075	14	0.028872	0.317589
	Glycerophospholipid metabolism	map00564	6	0.041327	0.422124
	Pyruvate metabolism	map00620	6	0.045953	0.438086
grey60	Name	Map	Up_Count	p	FDR
	MAPK signaling pathway - plant	map04016	9	6.04e-06	0.000432
	Plant-pathogen interaction	map04626	11	3.12e-06	0.000432
	Zeatin biosynthesis	map00908	5	0.000203	0.009696
	Cysteine and methionine metabolism	map00270	4	0.008108	0.289853
	Glutathione metabolism	map00480	3	0.02901	0.829684
paleturquoise	Name	Map	Up_Count	p	FDR
	Biosynthesis of amino acids	map01230	8	9.61e-06	0.001374
	Carbon metabolism	map01200	7	0.000546	0.026037
	Alanine, aspartate and glutamate metabolism	map00250	3	0.002506	0.083724
	Pyrimidine metabolism	map00240	3	0.005666	0.124874
	Steroid biosynthesis	map00100	2	0.006113	0.124874
	2-Oxocarboxylic acid metabolism	map01210	3	0.00772	0.137987
	Glycolysis / Gluconeogenesis	map00010	3	0.016269	0.239641
	Nicotinate and nicotinamide metabolism	map00760	2	0.016758	0.239641
	Exopolysaccharide biosynthesis	map00543	1	0.021452	0.27888
	Pyruvate metabolism	map00620	3	0.024605	0.293213
	Citrate cycle (TCA cycle)	map00020	2	0.029513	0.324645
	Anthocyanin biosynthesis	map00942	1	0.052797	0.419444
	Biosynthesis of cofactors	map01240	4	0.04804	0.419444
	Cutin, suberine and wax biosynthesis	map00073	2	0.042504	0.419444

## Sheet: Table S5
Table S5. Cytoscape Input values of four target modules.
darkgreen			grey60			paleturquoise			steelblue
fromNode	toNode	weight	fromNode	toNode	weight	fromNode	toNode	weight	fromNode	toNode	weight
RHC03H1G2260.2	RHC09H1G0493.2	0.275604	RHC05H1G2236.2	RHC01H1G3442.2	0.255035	RHC05H1G0312.2	RHC06H1G1155.2	0.065561	RHC07H1G2330.2	RHC02H1G2814.2	0.206025
RHC03H1G2260.2	RHC08H1G0200.2	0.284228	RHC05H1G2236.2	RHC06H1G0596.2	0.087739	RHC05H1G0312.2	RHC02H1G1257.2	0.204336	RHC07H1G2330.2	RHC04H1G2709.2	0.215577
RHC03H1G2260.2	RHC09H1G3019.2	0.270504	RHC05H1G2236.2	RHC01H1G4047.2	0.142998	RHC05H1G0312.2	RHC07H1G1622.2	0.111349	RHC07H1G2330.2	RHC06H1G0419.2	0.166522
RHC03H1G2260.2	RHC05H1G0998.2	0.295517	RHC05H1G2236.2	RHC02H1G2149.2	0.258041	RHC05H1G0312.2	RHC03H1G1383.2	0.047148	RHC07H1G2330.2	RHC04H1G1954.2	0.225312
RHC03H1G2260.2	RHC10H1G0446.2	0.281767	RHC05H1G2236.2	RHC02H1G2782.2	0.110943	RHC05H1G0312.2	RHC12H1G1861.2	0.161349	RHC07H1G2330.2	RHC01H1G4671.2	0.226854
RHC03H1G2260.2	RHC01H1G0338.2	0.25645	RHC05H1G2236.2	RHC02H1G0843.2	0.106508	RHC05H1G0312.2	RHC11H1G0851.2	0.152214	RHC07H1G2330.2	RHC01H1G2742.2	0.196607
RHC03H1G2260.2	RHC01H1G3644.2	0.252723	RHC05H1G2236.2	RHC07H1G1542.2	0.188951	RHC05H1G0312.2	RHC09H1G0239.2	0.095523	RHC07H1G2330.2	RHC08H1G1966.2	0.157052
RHC03H1G2260.2	RHC08H1G1438.2	0.20072	RHC05H1G2236.2	RHC01H1G3551.2	0.175404	RHC05H1G0312.2	RHC01H1G4550.2	0.159857	RHC07H1G2330.2	RHC11H1G1742.2	0.220723
RHC03H1G2260.2	RHC04H1G3095.2	0.246859	RHC05H1G2236.2	RHC10H1G1718.2	0.229424	RHC05H1G0312.2	RHC06H1G2995.2	0.203116	RHC07H1G2330.2	RHC01H1G4656.2	0.247356
RHC03H1G2260.2	RHC01H1G2714.2	0.271201	RHC05H1G2236.2	RHC02H1G0842.2	0.187756	RHC05H1G0312.2	RHC09H1G0128.2	0.141634	RHC07H1G2330.2	RHC07H1G1776.2	0.113917
RHC03H1G2260.2	RHC08H1G2459.2	0.266573	RHC05H1G2236.2	RHC06H1G0139.2	0.122784	RHC05H1G0312.2	RHC01H1G4494.2	0.192108	RHC07H1G2330.2	RHC11H1G2012.2	0.19552
RHC03H1G2260.2	RHC01H1G0326.2	0.196006	RHC05H1G2236.2	RHC04H1G1038.2	0.106991	RHC05H1G0312.2	RHC09H1G1249.2	0.156045	RHC07H1G2330.2	RHC02H1G0876.2	0.109216
RHC03H1G2260.2	RHC08H1G0479.2	0.294995	RHC05H1G2236.2	RHC02H1G2728.2	0.114115	RHC05H1G0312.2	RHC08H1G0523.2	0.084482	RHC07H1G2330.2	RHC01H1G4035.2	0.156918
RHC03H1G2260.2	RHC06H1G0593.2	0.240419	RHC05H1G2236.2	RHC04H1G0560.2	0.206815	RHC05H1G0312.2	RHC06H1G2812.2	0.168576	RHC07H1G2330.2	RHC10H1G1848.2	0.110217
RHC03H1G2260.2	RHC12H1G2066.2	0.224165	RHC05H1G2236.2	RHC05H1G0919.2	0.143364	RHC05H1G0312.2	RHC12H1G2533.2	0.086688	RHC07H1G2330.2	RHC10H1G2093.2	0.142287
RHC03H1G2260.2	RHC11H1G0319.2	0.274065	RHC05H1G2236.2	RHC07H1G2461.2	0.242016	RHC05H1G0312.2	RHC02H1G2858.2	0.178093	RHC07H1G2330.2	RHC01H1G3794.2	0.123195
RHC03H1G2260.2	RHC02H1G3007.2	0.280032	RHC05H1G2236.2	RHC09H1G2778.2	0.253757	RHC05H1G0312.2	RHC02H1G2682.2	0.017977	RHC07H1G2330.2	RHC04H1G1426.2	0.149763
RHC03H1G2260.2	RHC05H1G1124.2	0.21154	RHC05H1G2236.2	RHC10H1G0200.2	0.140672	RHC05H1G0312.2	RHC07H1G0743.2	0.048524	RHC07H1G2330.2	RHC02H1G1421.2	0.147656
RHC03H1G2260.2	RHC04H1G2340.2	0.294318	RHC05H1G2236.2	RHC06H1G1436.2	0.230558	RHC05H1G0312.2	RHC11H1G1504.2	0.179059	RHC07H1G2330.2	RHC03H1G1659.2	0.212987
RHC03H1G2260.2	RHC12H1G1927.2	0.223949	RHC05H1G2236.2	RHC02H1G2657.2	0.147321	RHC05H1G0312.2	RHC07H1G1217.2	0.088653	RHC07H1G2330.2	RHC01H1G3946.2	0.239455
RHC03H1G2260.2	RHC01H1G4519.2	0.214678	RHC05H1G2236.2	RHC12H1G0677.2	0.230476	RHC05H1G0312.2	RHC12H1G2248.2	0.189713	RHC07H1G2330.2	RHC04H1G0353.2	0.148769
RHC03H1G2260.2	RHC12H1G2579.2	0.252492	RHC05H1G2236.2	RHC10H1G2629.2	0.271667	RHC05H1G0312.2	RHC09H1G0276.2	0.067528	RHC07H1G2330.2	RHC09H1G0733.2	0.21513
RHC03H1G2260.2	RHC02H1G1283.2	0.236828	RHC05H1G2236.2	RHC07H1G1191.2	0.164874	RHC05H1G0312.2	RHC01H1G1743.2	0.198989	RHC07H1G2330.2	RHC01H1G2667.2	0.198558
RHC03H1G2260.2	RHC12H1G0579.2	0.27287	RHC05H1G2236.2	RHC06H1G2510.2	0.165501	RHC05H1G0312.2	RHC12H1G0460.2	0.167997	RHC07H1G2330.2	RHC08H1G0995.2	0.112399
RHC03H1G2260.2	RHC01H1G3446.2	0.218356	RHC05H1G2236.2	RHC10H1G2205.2	0.273031	RHC05H1G0312.2	RHC02H1G2027.2	0.166455	RHC07H1G2330.2	RHC08H1G1140.2	0.123081
RHC03H1G2260.2	RHC06H1G2146.2	0.297339	RHC05H1G2236.2	RHC06H1G2627.2	0.108051	RHC05H1G0312.2	RHC11H1G0140.2	0.204118	RHC07H1G2330.2	RHC10H1G1170.2	0.108275
RHC03H1G2260.2	RHC09H1G2296.2	0.197813	RHC05H1G2236.2	RHC10H1G2198.2	0.240883	RHC05H1G0312.2	RHC09H1G2049.2	0.08384	RHC07H1G2330.2	RHC11H1G2154.2	0.125976
RHC03H1G2260.2	RHC01H1G0382.2	0.26757	RHC05H1G2236.2	RHC08H1G1487.2	0.144386	RHC05H1G0312.2	RHC01H1G3275.2	0.121104	RHC07H1G2330.2	RHC01H1G3125.2	0.120945
RHC03H1G2260.2	RHC08H1G1618.2	0.25603	RHC05H1G2236.2	RHC09H1G0637.2	0.227618	RHC05H1G0312.2	RHC12H1G2645.2	0.140538	RHC07H1G2330.2	RHC04H1G0582.2	0.222492
RHC03H1G2260.2	RHC08H1G1788.2	0.315307	RHC05H1G2236.2	RHC11H1G0180.2	0.17357	RHC05H1G0312.2	RHC06H1G0507.2	0.132602	RHC07H1G2330.2	RHC12H1G2699.2	0.121539
RHC03H1G2260.2	RHC12H1G0417.2	0.238423	RHC05H1G2236.2	RHC09H1G2258.2	0.251822	RHC05H1G0312.2	RHC06H1G2898.2	0.104937	RHC07H1G2330.2	RHC12H1G0688.2	0.14417
RHC03H1G2260.2	RHC06H1G1494.2	0.241893	RHC05H1G2236.2	RHC01H1G4302.2	0.174627	RHC05H1G0312.2	RHC04H1G1705.2	0.154619	RHC07H1G2330.2	RHC04H1G2982.2	0.142006
RHC03H1G2260.2	RHC08H1G0334.2	0.216583	RHC05H1G2236.2	RHC10H1G2200.2	0.202545	RHC05H1G0312.2	RHC04H1G0442.2	0.126316	RHC07H1G2330.2	RHC02H1G1213.2	0.099415
RHC03H1G2260.2	RHC02H1G2323.2	0.243062	RHC05H1G2236.2	RHC07H1G2042.2	0.244522	RHC05H1G0312.2	RHC08H1G1180.2	0.077634	RHC07H1G2330.2	RHC08H1G1497.2	0.106535
RHC03H1G2260.2	RHC02H1G2882.2	0.186485	RHC05H1G2236.2	RHC12H1G1986.2	0.198266	RHC05H1G0312.2	RHC04H1G2214.2	0.188278	RHC07H1G2330.2	RHC11H1G2409.2	0.267807
RHC03H1G2260.2	RHC04H1G2194.2	0.267446	RHC05H1G2236.2	RHC11H1G2211.2	0.18914	RHC05H1G0312.2	RHC12H1G0478.2	0.063971	RHC07H1G2330.2	RHC09H1G2442.2	0.133044
RHC03H1G2260.2	RHC03H1G1232.2	0.252222	RHC05H1G2236.2	RHC08H1G2404.2	0.147405	RHC05H1G0312.2	RHC02H1G0828.2	0.160037	RHC07H1G2330.2	RHC06H1G2749.2	0.13511
RHC03H1G2260.2	RHC02H1G0894.2	0.283992	RHC05H1G2236.2	RHC03H1G1503.2	0.18196	RHC05H1G0312.2	RHC01H1G0664.2	0.157056	RHC07H1G2330.2	RHC10H1G1944.2	0.150576
RHC03H1G2260.2	RHC04H1G3081.2	0.242458	RHC05H1G2236.2	RHC01H1G4084.2	0.167708	RHC05H1G0312.2	RHC09H1G2925.2	0.09343	RHC07H1G2330.2	RHC06H1G0145.2	0.133158
RHC03H1G2260.2	RHC12H1G2285.2	0.238181	RHC05H1G2236.2	RHC03H1G2088.2	0.079729	RHC05H1G0312.2	RHC08H1G1029.2	0.176452	RHC07H1G2330.2	RHC06H1G0435.2	0.108669
RHC03H1G2260.2	RHC05H1G0687.2	0.294733	RHC05H1G2236.2	RHC11H1G1792.2	0.152113	RHC05H1G0312.2	RHC05H1G0200.2	0.213314	RHC07H1G2330.2	RHC08H1G1598.2	0.188529
RHC03H1G2260.2	RHC07H1G1551.2	0.285541	RHC05H1G2236.2	RHC02H1G1168.2	0.18389	RHC05H1G0312.2	RHC03H1G1636.2	0.129278	RHC07H1G2330.2	RHC02H1G1191.2	0.203285
RHC03H1G2260.2	RHC04H1G0896.2	0.16302	RHC05H1G2236.2	RHC10H1G1781.2	0.217114	RHC05H1G0312.2	RHC02H1G1349.2	0.220623	RHC07H1G2330.2	RHC03H1G2028.2	0.227762
RHC03H1G2260.2	RHC02H1G1413.2	0.291868	RHC05H1G2236.2	RHC02H1G1621.2	0.271652	RHC05H1G0312.2	RHC12H1G0852.2	0.080949	RHC07H1G2330.2	RHC01H1G1936.2	0.218811
RHC03H1G2260.2	RHC02H1G2562.2	0.300933	RHC05H1G2236.2	RHC09H1G2386.2	0.217955	RHC05H1G0312.2	RHC07H1G2250.2	0.087186	RHC07H1G2330.2	RHC05H1G0425.2	0.112967
RHC03H1G2260.2	RHC07H1G1424.2	0.26532	RHC05H1G2236.2	RHC04H1G2462.2	0.264634	RHC05H1G0312.2	RHC11H1G1039.2	0.157649	RHC07H1G2330.2	RHC01H1G4633.2	0.204694
RHC03H1G2260.2	RHC12H1G0578.2	0.271854	RHC05H1G2236.2	RHC09H1G1673.2	0.254964	RHC05H1G0312.2	RHC02H1G3058.2	0.128963	RHC07H1G2330.2	RHC02H1G1550.2	0.093408
RHC03H1G2260.2	RHC03H1G1711.2	0.245602	RHC05H1G2236.2	RHC09H1G1738.2	0.181408	RHC05H1G0312.2	RHC04H1G2121.2	0.196227	RHC07H1G2330.2	RHC04H1G0470.2	0.120817
RHC03H1G2260.2	RHC08H1G2453.2	0.262341	RHC05H1G2236.2	RHC01H1G3394.2	0.13406	RHC05H1G0312.2	RHC08H1G0213.2	0.044298	RHC07H1G2330.2	RHC0G01694.2	0.137671
RHC03H1G2260.2	RHC07H1G2442.2	0.245194	RHC05H1G2236.2	RHC07H1G1360.2	0.191583	RHC05H1G0312.2	RHC04H1G1879.2	0.096159	RHC07H1G2330.2	RHC01H1G3956.2	0.144093
RHC03H1G2260.2	RHC01H1G4459.2	0.248303	RHC05H1G2236.2	RHC10H1G2448.2	0.115641	RHC05H1G0312.2	RHC01H1G0381.2	0.105914	RHC07H1G2330.2	RHC11H1G1789.2	0.176032
RHC03H1G2260.2	RHC08H1G2047.2	0.233039	RHC05H1G2236.2	RHC09H1G2427.2	0.141396	RHC05H1G0312.2	RHC02H1G1165.2	0.015234	RHC07H1G2330.2	RHC05H1G0227.2	0.120452
RHC03H1G2260.2	RHC10H1G2869.2	0.244048	RHC05H1G2236.2	RHC02H1G2325.2	0.162514	RHC05H1G0312.2	RHC10H1G2695.2	0.127086	RHC07H1G2330.2	RHC04H1G2200.2	0.252859
RHC03H1G2260.2	RHC04H1G2480.2	0.228294	RHC05H1G2236.2	RHC10H1G2620.2	0.107474	RHC05H1G0312.2	RHC08H1G1836.2	0.097528	RHC07H1G2330.2	RHC01H1G0119.2	0.206176
RHC03H1G2260.2	RHC12H1G2144.2	0.211977	RHC05H1G2236.2	RHC05H1G1043.2	0.11005	RHC05H1G0312.2	RHC06H1G2866.2	0.133089	RHC07H1G2330.2	RHC05H1G0696.2	0.183063
RHC03H1G2260.2	RHC03H1G1436.2	0.272031	RHC05H1G2236.2	RHC11H1G0760.2	0.215064	RHC05H1G0312.2	RHC01H1G0828.2	0.10033	RHC07H1G2330.2	RHC04H1G2587.2	0.122846
RHC03H1G2260.2	RHC06H1G2432.2	0.256919	RHC05H1G2236.2	RHC08H1G2303.2	0.25085	RHC05H1G0312.2	RHC11H1G0489.2	0.010543	RHC07H1G2330.2	RHC01H1G4540.2	0.171282
RHC03H1G2260.2	RHC01H1G3526.2	0.240952	RHC05H1G2236.2	RHC02H1G0875.2	0.165857	RHC05H1G0312.2	RHC06H1G3056.2	0.084881	RHC07H1G2330.2	RHC03H1G1638.2	0.186666

## Sheet: Table S6
Table S6. Functional annotations of hub genes.
Module	Gene ID	Score	NR:Description	Uniprot:Description	Pfam:pfam_Name	KEGG:Description
darkgreen	RHC04H1G2194.2	6052	PREDICTED: probable methyltransferase PMT24 [Solanum tuberosum]	Probable methyltransferase PMT26	Methyltransf_29	.
darkgreen	RHC11H1G0118.2	5556	PREDICTED: U-box domain-containing protein 4 [Solanum tuberosum]	U-box domain-containing protein 4	Arm	.
darkgreen	RHC02H1G1300.2	5062	PREDICTED: probable receptor-like protein kinase At1g30570 [Solanum tuberosum]	Probable receptor-like protein kinase At1g30570	Malectin_like	.
darkgreen	RHC08H1G1438.2	4902	PREDICTED: uncharacterized protein LOC102598357 [Solanum tuberosum]	.	DUF642	.
darkgreen	RHC04H1G0822.2	4794	PREDICTED: uncharacterized membrane protein At1g16860-like [Solanum tuberosum]	Uncharacterized membrane protein At1g16860	HECT	.
darkgreen	RHC02H1G1413.2	4228	protein REDUCED WALL ACETYLATION-like isoform 1 [Solanum lycopersicum]	Protein REDUCED WALL ACETYLATION 3	Cas1_AcylT	CASD1; N-acetylneuraminate 9-O-acetyltransferase [EC:2.3.1.45]
darkgreen	RHC08H1G2453.2	4128	probable polygalacturonase isoform X4 [Solanum lycopersicum]	Probable polygalacturonase	Glyco_hydro_28	.
darkgreen	RHC11H1G0319.2	4098	PREDICTED: uncharacterized protein At1g04910 isoform X1 [Solanum tuberosum] >XP_015166727.1 PREDICTED: uncharacterized protein At1g04910 isoform X1 [Solanum tuberosum]	O-fucosyltransferase 39	O-FucT	.
darkgreen	RHC01H1G3797.2	3994	PREDICTED: transcription factor MYB35-like [Solanum tuberosum]	Transcription factor MYB61	Myb_DNA-binding	MYBP; transcription factor MYB, plant
darkgreen	RHC04H1G3122.2	3790	PREDICTED: expansin-A11 [Solanum tuberosum]	Expansin-A1	Pollen_allerg_1	.
darkgreen	RHC12H1G2066.2	3584	PREDICTED: V-type proton ATPase catalytic subunit A [Solanum tuberosum]	V-type proton ATPase catalytic subunit A	ATP-synt_ab	.
darkgreen	RHC05H1G1124.2	3548	PREDICTED: probable pectate lyase 5 [Solanum tuberosum]	Probable pectate lyase 5	Pec_lyase_C	pel; pectate lyase [EC:4.2.2.2]
darkgreen	RHC12H1G1808.2	3492	PREDICTED: protein NRT1/ PTR FAMILY 8.3-like [Solanum tuberosum]	Protein NRT1/ PTR FAMILY 8.3	PTR2	.
darkgreen	RHC03H1G2254.2	3440	PREDICTED: protein CDI-like [Solanum tuberosum] >XP_015162274.1 PREDICTED: protein CDI-like [Solanum tuberosum]	Protein CDI	Paf67	.
darkgreen	RHC01H1G2918.2	3350	PREDICTED: probable serine/threonine-protein kinase At4g35230 [Solanum tuberosum]	Serine/threonine-protein kinase BSK2	Pkinase	BSK; BR-signaling kinase [EC:2.7.11.1]
darkgreen	RHC02H1G2164.2	3314	PREDICTED: uncharacterized protein LOC102585003 [Solanum tuberosum]	.	DUF241	.
darkgreen	RHC06H1G0231.2	3294	PREDICTED: auxin-responsive protein IAA16-like [Solanum tuberosum]	Auxin-responsive protein IAA16	AUX_IAA	IAA; auxin-responsive protein IAA
darkgreen	RHC01H1G0382.2	3228	PREDICTED: fasciclin-like arabinogalactan protein 17 [Solanum tuberosum]	Fasciclin-like arabinogalactan protein 17	Fasciclin	.
darkgreen	RHC12H1G0417.2	3224	PREDICTED: 21 kDa protein-like [Solanum tuberosum]	Pectinesterase inhibitor 3	PMEI	.
darkgreen	RHC09H1G0091.2	3198	PREDICTED: S-type anion channel SLAH2-like [Solanum tuberosum]	S-type anion channel SLAH3	SLAC1	.
darkgreen	RHC05H1G0687.2	3184	Homeobox-leucine zipper protein HAT7, putative [Solanum demissum]	Homeobox-leucine zipper protein ATHB-13	Homeobox	HD-ZIP; homeobox-leucine zipper protein
darkgreen	RHC06H1G1730.2	3182	PREDICTED: auxilin-related protein 1 [Solanum tuberosum]	Auxilin-related protein 1	FimP	.
darkgreen	RHC08H1G1618.2	3156	PREDICTED: uncharacterized protein LOC102587808 isoform X1 [Solanum tuberosum]	Sulfite exporter TauE/SafE family protein 3	TauE	.
darkgreen	RHC03H1G2320.2	3152	PREDICTED: lysM domain receptor-like kinase 3 [Solanum tuberosum]	LysM domain receptor-like kinase 3	Pkinase_Tyr	.
darkgreen	RHC01H1G1915.2	3066	PREDICTED: uncharacterized protein LOC102597124 [Solanum tuberosum] >XP_015161927.1 PREDICTED: uncharacterized protein LOC102597124 [Solanum tuberosum]	.	Mob1_phocein	.
darkgreen	RHC04H1G3081.2	3028	PREDICTED: endoglucanase 10 [Solanum tuberosum]	Endoglucanase 2	Glyco_hydro_9	.
darkgreen	RHC09H1G1263.2	3016	PREDICTED: cell wall protein RBR3 [Solanum tuberosum]	.	SSP160	.
darkgreen	RHC07H1G2025.2	2966	PREDICTED: mitogen-activated protein kinase 20 isoform X1 [Solanum tuberosum]	Mitogen-activated protein kinase 20	Pkinase	.
darkgreen	RHC02H1G2707.2	2922	PREDICTED: protein trichome birefringence-like 19 [Solanum tuberosum]	Protein trichome birefringence-like 19	PMR5N	.
darkgreen	RHC08H1G2140.2	2856	PREDICTED: xyloglucan galactosyltransferase KATAMARI1 homolog [Solanum tuberosum]	Probable xyloglucan galactosyltransferase GT19	Exostosin	.
grey60	RHC04H1G1008.2	24942	hypothetical protein EJD97_010020 [Solanum chilense]	.	RTC	.
grey61	RHC07H1G2042.2	21612	PREDICTED: uncharacterized protein LOC102604739 [Solanum tuberosum]	.	Enoyl_reductase	.
grey62	RHC10H1G2629.2	21308	glucan endo-1,3-beta-glucosidase, acidic isoform PR-Q'-like precursor [Solanum tuberosum] >AFU52648.1 beta-1,3-glucanase 13 [Solanum tuberosum] >AGI42666.1 beta-1,3-glucanase class III, partial [Solanum tuberosum]	Glucan endo-1,3-beta-glucosidase, acidic isoform PR-Q'	Glyco_hydro_17	.
grey63	RHC01H1G4299.2	17674	PREDICTED: scopoletin glucosyltransferase-like [Solanum tuberosum]	Scopoletin glucosyltransferase	UDPGT	.
grey64	RHC12H1G1971.2	16076	PREDICTED: delta(12) oleic acid desaturase FAD2-like [Solanum tuberosum]	Delta(12)-acyl-lipid-desaturase	FA_desaturase	.
grey65	RHC09H1G2493.2	14192	PREDICTED: U-box domain-containing protein 44-like isoform X1 [Solanum tuberosum] >XP_006362165.1 PREDICTED: U-box domain-containing protein 44-like isoform X1 [Solanum tuberosum]	U-box domain-containing protein 24	U-box	.
grey66	RHC09H1G1673.2	13416	PREDICTED: cysteine-rich repeat secretory protein 55-like [Solanum tuberosum]	Cysteine-rich repeat secretory protein 55	Stress-antifung	.
grey67	RHC03H1G1792.2	12974	PREDICTED: kunitz-type trypsin inhibitor alpha chain-like [Solanum tuberosum]	Kunitz trypsin inhibitor 5	Kunitz_legume	.
grey68	RHC04H1G0675.2	12344	PREDICTED: uncharacterized protein LOC102602591 [Solanum tuberosum]	.	Acetyltransf_3	.
grey69	RHC02H1G3130.2	12192	hypothetical protein F8388_010355 [Cannabis sativa]	Lysine histidine transporter 1	Aa_trans	.
grey70	RHC09H1G0638.2	11806	pathogenesis related protein isoform b2 [Solanum phureja]	Pathogenesis-related leaf protein 4	CAP	PR1; pathogenesis-related protein 1
grey71	RHC08H1G1479.2	10804	PREDICTED: probable WRKY transcription factor 40 [Solanum tuberosum]	Probable WRKY transcription factor 40	WRKY	.
grey72	RHC08H1G1067.2	10668	probable linoleate 9S-lipoxygenase 5 [Solanum tuberosum] >Q43191.1 RecName: Full=Probable linoleate 9S-lipoxygenase 5; AltName: Full=Leaf lipoxygenase [Solanum tuberosum] >AAB67865.1 lipoxygenase [Solanum tuberosum]	Probable linoleate 9S-lipoxygenase 5	Lipoxygenase	LOX1_5; linoleate 9S-lipoxygenase [EC:1.13.11.58]
grey73	RHC04H1G2503.2	10624	PREDICTED: probable LRR receptor-like serine/threonine-protein kinase At4g08850 [Solanum tuberosum]	.	LRRNT_2	.
grey74	RHC02H1G1784.2	10612	PREDICTED: external alternative NAD(P)H-ubiquinone oxidoreductase B2, mitochondrial [Solanum tuberosum] >XP_015164172.1 PREDICTED: external alternative NAD(P)H-ubiquinone oxidoreductase B2, mitochondrial [Solanum tuberosum]	External alternative NAD(P)H-ubiquinone oxidoreductase B2, mitochondrial	Pyr_redox_2	ndh1; NADH:ubiquinone reductase (non-electrogenic) [EC:1.6.5.9]
grey75	RHC03H1G0578.2	9934	hypothetical protein EJD97_004357 [Solanum chilense]	.	7TM_GPCR_Srd	.
grey76	RHC01H1G3393.2	9718	PREDICTED: protein ZINC INDUCED FACILITATOR-LIKE 1-like isoform X1 [Solanum tuberosum]	Protein ZINC INDUCED FACILITATOR-LIKE 1	MFS_1	.
grey77	RHC09H1G0176.2	9194	PREDICTED: probable glutathione S-transferase [Solanum tuberosum]	Probable glutathione S-transferase	GST_N_3	GST, gst; glutathione S-transferase [EC:2.5.1.18]
grey78	RHC07H1G2461.2	8400	PREDICTED: ABC transporter C family member 3 [Solanum tuberosum]	ABC transporter C family member 3	ABC_membrane	.
grey79	RHC10H1G2198.2	8400	PREDICTED: uncharacterized protein LOC102584988 [Solanum tuberosum]	.	SOUL	.
grey80	RHC02H1G2149.2	8332	acidic endochitinase pcht28 precursor [Solanum tuberosum] >AAB96341.1 class II chitinase [Solanum tuberosum]	Acidic endochitinase pcht28	Glyco_hydro_19	.
grey81	RHC10H1G2205.2	8166	PREDICTED: probable glutathione S-transferase [Solanum tuberosum]	Probable glutathione S-transferase	GST_N_3	GST, gst; glutathione S-transferase [EC:2.5.1.18]
grey82	RHC11H1G1649.2	7564	PREDICTED: kiwellin-like [Solanum tuberosum]	Kiwellin	DPBB_1	.
grey83	RHC05H1G2545.2	7396	pleiotropic drug resistance protein 1-like [Solanum pennellii]	Pleiotropic drug resistance protein 1	ABC2_membrane	.
grey84	RHC11H1G2165.2	7336	PREDICTED: kiwellin-like [Solanum tuberosum]	Kiwellin	DPBB_1	.
grey85	RHC05H1G0530.2	7276	PREDICTED: protein DETOXIFICATION 14-like [Solanum tuberosum]	Protein DETOXIFICATION 14	MatE	TC.MATE, SLC47A, norM, mdtK, dinF; multidrug resistance protein, MATE family
grey86	RHC01H1G0578.2	7220	acidic class II 1,3-beta-glucanase precursor, partial [Solanum tuberosum]	Glucan endo-1,3-beta-glucosidase A	Glyco_hydro_17	.
grey87	RHC12H1G0454.2	7012	PREDICTED: IQ domain-containing protein IQM1 [Solanum tuberosum]	IQ domain-containing protein IQM1	DUF724	.
grey88	RHC04H1G2462.2	6820	hypothetical protein EJD97_000667 [Solanum chilense]	.	DUF1345	.
grey89	RHC01H1G3701.2	6608	PREDICTED: calmodulin-binding protein 60 C [Solanum tuberosum] >XP_015163023.1 PREDICTED: calmodulin-binding protein 60 C [Solanum tuberosum] >XP_015163024.1 PREDICTED: calmodulin-binding protein 60 C [Solanum tuberosum]	Calmodulin-binding protein 60 C	Calmodulin_bind	.
paleturquoise	RHC09H1G1249.2	31	PREDICTED: protein FATTY ACID EXPORT 3, chloroplastic [Solanum tuberosum] >XP_015161575.1 PREDICTED: protein FATTY ACID EXPORT 3, chloroplastic [Solanum tuberosum]	Protein FATTY ACID EXPORT 3, chloroplastic	Tmemb_14	.
paleturquoise	RHC02H1G1257.2	27	delta(24)-sterol reductase-like [Solanum tuberosum] >CBP07445.1 sterol reductase [Solanum tuberosum]	Delta(24)-sterol reductase	FAD_binding_4	DHCR24, DWF1; Delta24-sterol reductase [EC:1.3.1.72 1.3.1.-]
paleturquoise	RHC02H1G2055.2	24	PREDICTED: apyrase-like [Solanum tuberosum] >XP_006363162.1 PREDICTED: apyrase-like [Solanum tuberosum]	Apyrase	GDA1_CD39	.
paleturquoise	RHC12H1G0460.2	23	PREDICTED: carbamoyl-phosphate synthase small chain, chloroplastic-like isoform X1 [Solanum tuberosum]	Carbamoyl-phosphate synthase small chain, chloroplastic	CPSase_sm_chain	carA, CPA1; carbamoyl-phosphate synthase small subunit [EC:6.3.5.5]
paleturquoise	RHC02H1G3058.2	21	isocitrate dehydrogenase [NADP] [Solanum pennellii]	Isocitrate dehydrogenase [NADP], chloroplastic/mitochondrial	Iso_dh	IDH1, IDH2, icd; isocitrate dehydrogenase [EC:1.1.1.42]
paleturquoise	RHC11H1G0851.2	21	PREDICTED: dihydrolipoyllysine-residue acetyltransferase component 5 of pyruvate dehydrogenase complex, chloroplastic [Solanum tuberosum]	Dihydrolipoyllysine-residue acetyltransferase component 5 of pyruvate dehydrogenase complex, chloroplastic	2-oxoacid_dh	DLAT, aceF, pdhC; pyruvate dehydrogenase E2 component (dihydrolipoamide acetyltransferase) [EC:2.3.1.12]
paleturquoise	RHC08H1G0523.2	19	PREDICTED: 2-keto-3-deoxy-L-rhamnonate aldolase-like [Solanum tuberosum]	2-keto-3-deoxy-L-rhamnonate aldolase	HpcH_HpaI	rhmA; 2-dehydro-3-deoxy-L-rhamnonate aldolase [EC:4.1.2.53]
paleturquoise	RHC08H1G1029.2	18	PREDICTED: delta-1-pyrroline-5-carboxylate synthase [Solanum tuberosum]	Delta-1-pyrroline-5-carboxylate synthase	AA_kinase	ALDH18A1, P5CS; delta-1-pyrroline-5-carboxylate synthetase [EC:2.7.2.11 1.2.1.41]
paleturquoise	RHC05H1G0200.2	18	PREDICTED: zeatin O-glucosyltransferase-like [Solanum tuberosum]	Zeatin O-glucosyltransferase	ABC2_membrane_3	.
paleturquoise	RHC09H1G2049.2	18	PREDICTED: 2-methyl-6-phytyl-1,4-hydroquinone methyltransferase, chloroplastic-like [Solanum tuberosum]	2-methyl-6-phytyl-1,4-hydroquinone methyltransferase, chloroplastic	Methyltransf_11	.
paleturquoise	RHC06H1G2915.2	17	PREDICTED: 125 kDa kinesin-related protein-like [Solanum tuberosum]	Kinesin-like protein KIN-5D	Kinesin	.
paleturquoise	RHC12H1G0478.2	17	PREDICTED: IAA-amino acid hydrolase ILR1-like 4 [Solanum tuberosum]	IAA-amino acid hydrolase ILR1-like 4	Peptidase_M20	IAR3, ILL6; jasmonoyl-L-amino acid hydrolase [EC:3.5.1.127]
paleturquoise	RHC06H1G2866.2	16	PREDICTED: (R)-specific enoyl-CoA hydratase [Solanum tuberosum]	(R)-specific enoyl-CoA hydratase	MaoC_dehydratas	.
paleturquoise	RHC01H1G4494.2	16	hypothetical protein G4B88_007865 [Cannabis sativa]	Bifunctional dihydrofolate reductase-thymidylate synthase	Thymidylat_synt	.
paleturquoise	RHC12H1G0220.2	15	PREDICTED: nascent polypeptide-associated complex subunit alpha, muscle-specific form-like [Solanum tuberosum]	Protodermal factor 1	DUF3120	.
paleturquoise	RHC01H1G3809.2	15	PREDICTED: pentatricopeptide repeat-containing protein At4g38150-like [Solanum tuberosum]	Pentatricopeptide repeat-containing protein At4g20090	PPR_2	.
paleturquoise	RHC01H1G1743.2	15	4-hydroxy-tetrahydrodipicolinate reductase 1, chloroplastic-like [Solanum pennellii]	4-hydroxy-tetrahydrodipicolinate reductase 1, chloroplastic	DapB_N	dapB; 4-hydroxy-tetrahydrodipicolinate reductase [EC:1.17.1.8]
paleturquoise	RHC06H1G2898.2	15	PREDICTED: carbamoyl-phosphate synthase large chain, chloroplastic, partial [Solanum tuberosum]	Carbamoyl-phosphate synthase large chain, chloroplastic	CPSase_L_D2	carB, CPA2; carbamoyl-phosphate synthase large subunit [EC:6.3.5.5]
paleturquoise	RHC09H1G0239.2	15	PREDICTED: transcription factor AS1 [Solanum tuberosum] >XP_015161455.1 PREDICTED: transcription factor AS1 [Solanum tuberosum]	Transcription factor AS1	Myb_DNA-binding	MYBP; transcription factor MYB, plant
paleturquoise	RHC11H1G0829.2	15	probable complex I intermediate-associated protein 30 [Solanum lycopersicum] >XP_015056691.1 probable complex I intermediate-associated protein 30 isoform X1 [Solanum pennellii] >TMW98444.1 hypothetical protein EJD97_004015 [Solanum chilense]	Probable complex I intermediate-associated protein 30	CIA30	NDUFAF1, CIA30; NADH dehydrogenase [ubiquinone] 1 alpha subcomplex assembly factor 1
paleturquoise	RHC08H1G1326.2	15	PREDICTED: calcineurin B-like protein 10 [Solanum tuberosum]	Calcineurin B-like protein 10	EF-hand_7	PPP3R, CNB; serine/threonine-protein phosphatase 2B regulatory subunit
paleturquoise	RHC01H1G2525.2	14	PREDICTED: germin-like protein subfamily 1 member 13 [Solanum tuberosum]	Germin-like protein subfamily 1 member 13	Cupin_1	.
paleturquoise	RHC05H1G0312.2	14	PREDICTED: heat shock protein 90-5, chloroplastic [Solanum tuberosum]	Heat shock protein 90-5, chloroplastic	HSP90	HSP90B, TRA1; heat shock protein 90kDa beta
paleturquoise	RHC07H1G1622.2	14	glycine-rich cell wall structural protein 1-like [Solanum lycopersicum]	.	Lipoprotein_11	.
paleturquoise	RHC09H1G0128.2	14	PREDICTED: acetyl-coenzyme A carboxylase carboxyl transferase subunit alpha, chloroplastic [Solanum tuberosum] >XP_015158770.1 PREDICTED: acetyl-coenzyme A carboxylase carboxyl transferase subunit alpha, chloroplastic [Solanum tuberosum]	Acetyl-coenzyme A carboxylase carboxyl transferase subunit alpha, chloroplastic	ACCA	accA; acetyl-CoA carboxylase carboxyl transferase subunit alpha [EC:6.4.1.2 2.1.3.15]
paleturquoise	RHC01H1G3380.2	13	PREDICTED: uncharacterized protein LOC102588020 [Solanum tuberosum]	.	EPL1	.
paleturquoise	RHC05H1G2609.2	13	epoxide hydrolase [Solanum tuberosum] >AAA81890.1 epoxide hydrolase [Solanum tuberosum]	Epoxide hydrolase A	Abhydrolase_1	.
paleturquoise	RHC04H1G2121.2	13	PREDICTED: protein SLOW GREEN 1, chloroplastic [Solanum tuberosum] >XP_006367387.1 PREDICTED: protein SLOW GREEN 1, chloroplastic [Solanum tuberosum]	protein SLOW GREEN 1, chloroplastic	TPR_19	.
paleturquoise	RHC07H1G0234.2	13	calcineurin subunit B-like [Solanum lycopersicum] >XP_015081074.1 calcineurin subunit B-like [Solanum pennellii]	Calcineurin subunit B	EF-hand_7	.
paleturquoise	RHC01H1G4550.2	13	PREDICTED: NADP-dependent D-sorbitol-6-phosphate dehydrogenase-like [Solanum tuberosum]	NADP-dependent D-sorbitol-6-phosphate dehydrogenase	Aldo_ket_red	E1.1.1.200; aldose-6-phosphate reductase (NADPH2) [EC:1.1.1.200]
steelblue	RHC03H1G2045.2	356	hypothetical protein EJD97_023973 [Solanum chilense]	(+)-cis,trans-nepetalactol synthase NEPS1	adh_short_C2	.
steelblue	RHC04H1G2200.2	322	PREDICTED: premnaspirodiene oxygenase-like [Solanum tuberosum]	Premnaspirodiene oxygenase	p450	.
steelblue	RHC01H1G4737.2	314	PREDICTED: probable flavin-containing monooxygenase 1 [Solanum tuberosum]	Probable flavin-containing monooxygenase 1	FMO-like	FMO; dimethylaniline monooxygenase (N-oxide forming) [EC:1.14.13.8]
steelblue	RHC01H1G0199.2	314	PREDICTED: probable S-adenosylmethionine-dependent methyltransferase At5g37990 [Solanum tuberosum]	Loganic acid O-methyltransferase	Methyltransf_7	.
steelblue	RHC10H1G2231.2	298	PREDICTED: vacuolar amino acid transporter 1-like [Solanum tuberosum]	Amino acid transporter AVT1E	Aa_trans	SLC32A, VGAT; solute carrier family 32 (vesicular inhibitory amino acid transporter)
steelblue	RHC03H1G1659.2	292	PREDICTED: V-type proton ATPase subunit C [Solanum tuberosum]	V-type proton ATPase subunit C	V-ATPase_C	ATPeV1C, ATP6C; V-type H+-transporting ATPase subunit C
steelblue	RHC05H1G0653.2	278	TCP-domain protein-like, putative [Solanum demissum]	Transcription factor PCF3	TCP	.
steelblue	RHC07H1G1629.2	273	PREDICTED: L-ascorbate oxidase homolog [Solanum tuberosum]	L-ascorbate oxidase homolog	Cu-oxidase_3	E1.10.3.3; L-ascorbate oxidase [EC:1.10.3.3]
steelblue	RHC08H1G1616.2	266	PREDICTED: L-ornithine N5-acetyltransferase NATA1-like [Solanum tuberosum]	L-ornithine N5-acetyltransferase NATA1	Acetyltransf_1	NATA1; L-ornithine N5-acetyltransferase [EC:2.3.1.-]
steelblue	RHC01H1G4671.2	264	PREDICTED: V-type proton ATPase subunit B2 [Solanum tuberosum] >XP_006364500.1 PREDICTED: V-type proton ATPase subunit B2 [Solanum tuberosum]	V-type proton ATPase subunit B2	ATP-synt_ab	ATPeV1B, ATP6B; V-type H+-transporting ATPase subunit B
steelblue	RHC12H1G1828.2	252	Omega-6 fatty acid desaturase, endoplasmic reticulum [Capsicum annuum]	Delta(12)-acyl-lipid-desaturase	FA_desaturase	.
steelblue	RHC12H1G2086.2	252	PREDICTED: endoglucanase 6 [Solanum tuberosum]	Endoglucanase 6	Glyco_hydro_9	E3.2.1.4; endoglucanase [EC:3.2.1.4]
steelblue	RHC10H1G1170.2	244	PREDICTED: vicianin hydrolase-like [Solanum tuberosum]	Vicianin hydrolase (Fragment)	Glyco_hydro_1	.
steelblue	RHC02H1G3213.2	234	PREDICTED: protein LONGIFOLIA 1 [Solanum tuberosum]	Protein LONGIFOLIA 2	DUF4378	.
steelblue	RHC04H1G2966.2	231	PREDICTED: deSI-like protein At4g17486 [Solanum tuberosum] >XP_015160842.1 PREDICTED: deSI-like protein At4g17486 [Solanum tuberosum] >XP_015160843.1 PREDICTED: deSI-like protein At4g17486 [Solanum tuberosum]	DeSI-like protein At4g17486	Peptidase_C97	DESI2, PPPDE1; deubiquitinase DESI2 [EC:3.4.19.12]
steelblue	RHC01H1G2535.2	230	hypothetical protein EJD97_009423 [Solanum chilense]	Protein IQ-DOMAIN 11	DUF4005	.
steelblue	RHC04H1G2213.2	228	PREDICTED: 2-oxoisovalerate dehydrogenase subunit alpha 1, mitochondrial-like isoform X1 [Solanum tuberosum]	2-oxoisovalerate dehydrogenase subunit alpha 1, mitochondrial	E1_dh	BCKDHA, bkdA1; 2-oxoisovalerate dehydrogenase E1 component alpha subunit [EC:1.2.4.4]
steelblue	RHC01H1G4540.2	225	PREDICTED: endoglucanase 24-like [Solanum tuberosum]	Endoglucanase 24	Glyco_hydro_9	E3.2.1.4; endoglucanase [EC:3.2.1.4]
steelblue	RHC11H1G2012.2	224	UDP-D-apiose/UDP-D-xylose synthase 2 [Solanum lycopersicum] >XP_015058696.1 UDP-D-apiose/UDP-D-xylose synthase 2 [Solanum pennellii]	UDP-D-apiose/UDP-D-xylose synthase 2	Epimerase	AXS; UDP-apiose/xylose synthase
steelblue	RHC11H1G2409.2	214	PREDICTED: tetraspanin-3-like [Solanum tuberosum]	Tetraspanin-3	Tetraspannin	.
steelblue	RHC04H1G1954.2	214	PREDICTED: lipoxygenase homology domain-containing protein 1-like [Solanum tuberosum]	PLAT domain-containing protein 1	PLAT	.
steelblue	RHC02H1G1473.2	212	PREDICTED: probable LRR receptor-like serine/threonine-protein kinase At1g53430 isoform X1 [Solanum tuberosum]	Probable LRR receptor-like serine/threonine-protein kinase At1g53430	Pkinase	.
steelblue	RHC01H1G1936.2	212	PREDICTED: galactokinase [Solanum tuberosum]	Galactokinase	GalKase_gal_bdg	GALK2; N-acetylgalactosamine kinase [EC:2.7.1.157]
steelblue	RHC06H1G2167.2	208	PREDICTED: 2-alkenal reductase (NADP(+)-dependent) [Solanum tuberosum]	2-alkenal reductase (NADP(+)-dependent)	ADH_N_2	DBR; 2-alkenal reductase (NADP+) [EC:1.3.1.102]
steelblue	RHC01H1G3794.2	204	PREDICTED: probable carbohydrate esterase At4g34215 [Solanum tuberosum]	Probable carbohydrate esterase At4g34215	SASA	.
steelblue	RHC09H1G0716.2	204	PREDICTED: uncharacterized protein LOC102603607 [Solanum tuberosum]	E3 ubiquitin-protein ligase APD2	DUF4793	.
steelblue	RHC07H1G2339.2	203	PREDICTED: protein disulfide isomerase-like 5-4 [Solanum tuberosum]	Protein disulfide isomerase-like 5-4	COPIIcoated_ERV	.
steelblue	RHC09H1G0733.2	201	PREDICTED: cytosolic sulfotransferase 7-like [Solanum tuberosum]	Cytosolic sulfotransferase 5	Sulfotransfer_1	.
steelblue	RHC11H1G0435.2	201	PREDICTED: armadillo repeat-containing kinesin-like protein 1 isoform X1 [Solanum tuberosum]	Kinesin-like protein KIN-UC	Kinesin	.
steelblue	RHC01H1G0265.2	197	Hcr9-4C [Solanum habrochaites]	Receptor-like protein Cf-9	LRRNT_2	.

## Sheet: Table S7
Table S7. Expression patterns of candidate hub genes by transcription measured.
Model	GeneID	TFS_root_1	TFS_root_2	TFS_root_3	TFS_stem_1	TFS_stem_2	TFS_stem_3	TFS_leaf_1	TFS_leaf_2	TFS_leaf_3	SS_root_1	SS_root_2	SS_root_3	SS_stem_1	SS_stem_2	SS_stem_3	SS_leaf_1	SS_leaf_2	SS_leaf_3	TES_root_1	TES_root_2	TES_root_3	TES_stem_1	TES_stem_2	TES_stem_3	TES_leaf_1	TES_leaf_2	TES_leaf_3
darkgreen	RHC02H1G1413.2	33.6491	40.9996	36.326	81.9294	89.3629	95.3618	32.3196	20.3567	22.275	57.0439	66.4936	47.7035	95.7134	92.933	85.0854	28.6012	21.7902	28.9188	50.4644	62.6661	50.5877	72.8639	64.738	95.0431	32.186	30.1129	25.7028
darkgreen	RHC12H1G2066.2	123.158	150.969	168.03	422.24	452.738	519.111	211.279	133.644	182.754	178.944	235.425	188.572	431.911	388.425	411.088	141.919	176.663	163.16	212.829	263.315	257.552	498.289	437.982	516.628	252.227	211.438	229.537
darkgreen	RHC08H1G1438.2	1.90017	15.2342	3.18483	2333.72	2583.48	2686.24	337.067	71.0391	182.607	4.60575	10.8278	2.36441	4160.22	958.425	1748.32	46.3818	164.293	171.57	14.8353	13.952	2.82483	2078.63	1469.84	3737.93	335.848	140.67	216.732
darkgreen	RHC11H1G0118.2	17.4329	24.6287	22.1981	66.9536	69.6949	78.8163	27.3307	19.0711	24.0418	19.7837	23.1252	20.1806	64.4755	54.4553	54.8371	28.5991	21.4034	22.8704	25.3395	22.3127	25.8989	44.4808	36.0037	61.3275	20.7444	20.004	20.4744
darkgreen	RHC03H1G2254.2	20.8456	20.3623	19.746	154.641	197.59	176.85	30.1407	13.5363	26.8639	35.4186	46.7913	21.7735	159.269	202.402	136.775	13.9421	20.9962	19.0796	27.9252	28.4078	14.9383	112.473	88.6705	133.846	29.5564	21.1863	18.6921
darkgreen	RHC05H1G1124.2	0	2.50947	0.589431	269.62	295.396	324.304	79.5531	39.4976	62.2754	1.03507	1.8275	0.478617	280.358	258.762	233.307	8.1017	49.6931	35.7119	2.87848	4.41867	0.245064	194.241	121.174	283.237	97.4787	73.0409	85.6893
darkgreen	RHC05H1G0687.2	29.8542	43.5945	31.2736	191.531	186.149	219.872	16.6158	8.94754	26.3018	20.1006	28.3049	33.0143	175.845	170.968	205.335	3.05563	27.2301	14.7283	59.0095	68.224	51.3677	162.942	109.32	213.755	22.1766	3.38358	12.4643
darkgreen	RHC09H1G1263.2	13.8376	17.8759	17.3736	35.0785	37.2032	39.7283	16.9611	7.46455	12.059	17.8599	16.2023	16.2684	39.5644	32.7433	35.5675	15.7692	11.1996	14.6088	11.9521	18.683	15.7811	39.4169	31.2001	48.0451	19.1922	17.5492	15.1703
darkgreen	RHC02H1G1300.2	7.95752	14.5245	7.44907	21.8073	27.6554	27.4503	6.87704	3.47241	6.19025	11.2122	12.7044	8.47631	27.3167	33.6673	23.8874	4.80114	5.40636	4.84362	9.4608	11.3429	7.37394	23.0953	20.0056	28.8008	10.0782	6.85448	8.85605
darkgreen	RHC01H1G0382.2	107.694	113.15	122.687	414.986	403.62	429.69	139.414	122.943	141.68	163.061	147.273	84.1888	464.961	393.842	352.089	65.1388	115.443	134.751	97.6567	110.76	67.2847	300.756	270.832	321.181	106.411	89.6209	109.373
darkgreen	RHC04H1G3081.2	21.7497	22.4813	36.6819	285.753	256.313	261.606	60.3114	26.605	49.2455	37.9853	64.2578	20.879	337.801	154.439	220.456	10.375	46.9644	37.6557	51.6951	70.6679	42.7533	214.47	205.653	259.697	63.8562	43.8405	50.3171
darkgreen	RHC02H1G2164.2	0.978052	1.67948	1.5834	33.4259	25.4365	35.7073	2.22248	0.173673	0.548337	1.53939	2.46956	1.7287	28.9913	17.0987	17.5547	1.48545	0.476508	0.829045	3.35892	3.57844	5.4731	15.5279	13.1326	30.4438	2.36165	3.35209	3.18913
darkgreen	RHC08H1G2140.2	10.3866	12.1711	11.0618	31.3027	29.5542	28.9032	10.9979	9.12951	13.6243	17.0335	18.5602	10.714	30.3374	28.8748	33.069	5.32751	13.5552	8.36397	14.4719	13.9907	7.64	31.7461	27.4556	30.9575	14.834	10.7783	12.2801
darkgreen	RHC01H1G3797.2	0.330311	0.97054	0.968843	38.7968	39.2613	46.094	3.09615	0.387112	1.45503	3.03094	1.5981	0.256881	58.0567	40.9062	34.6851	0.29044	1.06212	1.28794	0.901207	3.9557	0.997435	10.8795	11.0119	24.4924	1.50402	0.679246	1.02678
darkgreen	RHC09H1G0091.2	0	0.407846	0.254458	15.8979	9.05631	14.1737	0.455379	0	0.42801	0.042055	0.043527	0	13.5442	6.65233	4.45635	0	0.13018	0.205901	0.10196	0.190754	0.112847	6.02254	4.25408	8.79391	0.506938	0	0.058084
darkgreen	RHC03H1G2320.2	7.49447	12.8246	8.56451	26.0859	30.2191	37.7564	9.9342	8.1927	6.67772	11.1323	10.3773	8.07203	26.8651	19.8934	21.3901	13.4792	5.97141	9.38464	7.99852	9.32126	6.82489	19.3813	14.7801	23.6809	9.97733	9.30382	9.41851
darkgreen	RHC11H1G0319.2	219.393	211.675	237.594	705.38	827.82	821.948	249.929	166.991	198.495	263.398	315.087	216.909	905.859	729.445	633.843	129.114	167.669	222.273	246.727	299.5	334.086	458.458	383.433	652.391	223.143	243.411	216.031
darkgreen	RHC12H1G0417.2	44.4315	48.0384	55.9468	156.919	175.196	195.618	18.2296	16.656	17.0022	50.5066	46.2426	39.7024	232.494	264.798	162.712	29.2026	12.427	15.5975	38.6187	86.3482	61.5072	176.251	82.8605	255.462	31.5048	17.6891	24.1463
darkgreen	RHC08H1G1618.2	94.4857	115.324	111.894	651.314	667.312	649.659	188.972	130.775	182.831	133.619	147.43	118.992	457.513	425.469	453.937	122.119	138.081	149.077	143.936	124.285	107.948	417.242	364.774	328.16	187.414	123.316	142.802
darkgreen	RHC01H1G2918.2	46.8567	54.3463	49.3849	107.301	129.935	137.438	59.254	39.9366	45.2728	50.7895	48.5076	60.0461	104.567	80.5537	98.5531	74.3329	43.4405	39.3291	51.9986	46.896	48.6251	100.419	80.9579	95.4968	52.8816	51.1556	49.9186
darkgreen	RHC04H1G3122.2	0.109591	0	0	22.0939	14.159	18.2016	4.45141	1.17734	3.28273	0.189739	1.27646	0.319608	25.69	5.73775	20.2011	0.385453	3.42605	3.53001	1.72503	0.64546	0	13.4866	9.59641	16.1329	3.01484	2.44142	2.75155
darkgreen	RHC06H1G1730.2	22.3068	23.7731	22.2749	64.1598	64.8581	60.2836	24.3789	21.05	18.7337	25.7302	24.4504	26.3035	65.339	49.5275	45.2006	28.2751	20.0797	23.3776	30.7649	30.6554	35.3284	43.3579	42.8498	42.3304	23.0293	18.7159	23.6218
darkgreen	RHC12H1G1808.2	2.31601	2.02531	3.94245	8.08264	9.30619	10.9817	1.40706	0.565473	1.36028	4.38568	4.92824	3.33025	9.26261	6.4126	7.71376	0.933374	1.12052	0.817984	4.05058	4.02586	3.02608	10.3911	7.68652	10.8384	1.46466	1.2816	2.30749
darkgreen	RHC01H1G1915.2	10.529	20.9806	6.44428	86.76	80.0256	81.9211	12.8141	4.27496	5.21133	16.4882	12.7194	6.3253	109.217	59.7949	81.7507	2.91267	8.13651	5.61568	12.5386	12.5419	6.7326	92.7048	60.7829	92.753	22.2204	9.02156	13.0127
darkgreen	RHC07H1G2025.2	3.94119	5.49383	4.84748	13.8642	14.2769	16.9378	6.12645	4.02145	5.92523	8.04561	7.04472	4.46033	14.7918	11.1543	12.3847	3.46547	5.32419	5.70087	6.91351	6.31315	3.98527	12.1537	9.55712	10.7761	5.8033	4.95617	5.20434
darkgreen	RHC02H1G2707.2	17.7088	20.9257	20.5774	42.6105	44.77	47.8625	20.9234	6.10414	11.2751	22.4151	22.6663	17.2151	48.9529	36.7088	30.1611	8.50532	11.0324	13.1187	28.8897	22.3499	21.4315	31.779	33.2838	38.1339	14.5402	10.8381	16.5466
darkgreen	RHC04H1G0822.2	27.9496	28.0338	34.4533	109.073	102.572	114.066	38.2483	16.251	31.4956	44.0573	46.8804	37.1539	128.479	54.4493	85.6866	11.7736	27.5772	24.4077	33.6266	39.3033	24.0816	87.8706	76.8031	113.262	38.0436	33.6942	30.4632
darkgreen	RHC04H1G2194.2	40.9044	62.8759	48.1414	269.104	260.879	292.789	65.1756	25.3592	47.5231	83.6567	88.7259	61.5471	336.69	184.208	206.031	23.572	45.8761	42.017	73.1074	85.3173	47.2233	240.979	220.872	256.842	82.8611	61.3922	68.9735
darkgreen	RHC06H1G0231.2	0.570052	2.15353	0.477725	268.045	225.683	232.436	19.1173	1.44751	11.2498	0	0.919338	0.110832	195.55	67.9561	84.7599	2.90721	3.5642	7.63463	0	4.58849	0	148.763	88.046	110.77	14.276	0.390749	1.22679
darkgreen	RHC08H1G2453.2	43.4614	30.3186	40.2895	146.044	128.072	170.888	50.8586	40.0342	54.6609	54.0296	65.7659	44.0501	127.684	104.114	102.741	28.2273	42.3488	44.5848	32.7801	36.5418	30.7593	88.9882	83.2368	124.606	49.4268	35.1759	45.2453
grey60	name	TFS_root_1	TFS_root_2	TFS_root_3	TFS_stem_1	TFS_stem_2	TFS_stem_3	TFS_leaf_1	TFS_leaf_2	TFS_leaf_3	SS_root_1	SS_root_2	SS_root_3	SS_stem_1	SS_stem_2	SS_stem_3	SS_leaf_1	SS_leaf_2	SS_leaf_3	TES_root_1	TES_root_2	TES_root_4	TES_stem_1	TES_stem_3	TES_stem_4	TES_leaf_1	TES_leaf_2	TES_leaf_3
grey60	RHC01H1G3393.2	0.45395	0.612471	0.6114	4.54746	0.598462	0.398914	0.74295	1.96338	0.685601	0.842074	3.951	0.819545	17.8919	0.457056	2.15283	0.798311	0.637165	0.32982	4.49141	3.81946	5.0463	2.05383	1.50517	0.14143	1.47642	0.889043	0.697806
grey60	RHC09H1G0638.2	0.159743	0.502895	0.502016	0	0.589671	0.701882	0.166372	0.156011	0	0	0.858742	0.31058	26.043	0.160837	0.139553	1.54508	0	0	8.21387	6.42907	5.38034	9.97374	0	0.522571	0.151535	0	0
grey60	RHC04H1G1008.2	2.79639	2.93447	0.650965	6.65739	0.286736	0.81912	0.323602	0	0.821214	3.22764	1.6703	0.604094	31.7718	0.938508	0.542877	3.27847	2.49774	2.63373	4.56469	0.914992	2.52605	1.68691	0.3278	3.7269	4.12641	2.66224	2.97185
grey60	RHC08H1G1479.2	4.55535	1.15386	2.46824	0	1.30465	0.138037	0.327198	0.306822	2.07585	6.39103	2.9555	1.22161	86.0704	0.316312	0.686136	16.4364	1.12244	1.73094	37.9123	14.1858	5.10823	4.97483	1.65721	3.59703	2.98018	1.74969	2.44146
grey60	RHC09H1G0176.2	10.1995	5.69029	10.6845	13.4543	0.357438	0.113455	0	0	0	19.5587	5.78376	7.40498	116.327	1.94987	1.1279	1.70286	0.461277	0.437752	29.9415	12.1665	12.8955	0.233651	0	0	0	0.110623	0
grey60	RHC10H1G2198.2	1.97922	2.52202	0.444284	44.3352	32.8771	31.5552	9.27606	9.80295	6.60119	1.22382	0.253329	0.824589	288.442	34.5887	17.6611	35.1793	7.07137	15.4587	3.1154	0.277548	0.820965	7.16375	5.96596	15.7241	1.87752	1.93811	0.84512
grey60	RHC12H1G0454.2	4.43746	5.01478	4.64844	3.76769	0.57751	0.349953	0.059251	0	0.50121	8.56917	3.51704	3.20766	52.4113	5.15519	1.1928	0.900424	0.355703	0.289339	10.2683	6.58966	8.58958	2.26505	3.84126	1.24071	0.809507	0.73118	1.02027
grey60	RHC02H1G2149.2	8.32276	8.85338	6.44928	30.2023	25.3564	24.3457	22.4421	11.6914	16.9751	2.46737	11.6449	1.88414	418.376	14.5784	54.4814	64.1592	14.155	19.0383	231.262	42.5275	59.4538	76.5481	27.1836	35.9288	38.8265	78.0521	46.6179
grey60	RHC03H1G1792.2	0	5.21848	0	0.968651	0.786722	0.99886	0.443937	0	0.500707	0	0.636505	1.65746	65.928	0.429167	0.993001	0.499733	0.507636	0.361311	23.7066	1.9526	5.28058	14.2709	1.04929	0.154933	0.134782	0.365223	0.169873
grey60	RHC11H1G2165.2	0	2.08949	0	2.06853	3.06255	0.116651	0	0	0.350847	0.804385	0	0.903305	51.2222	11.2269	0.579833	3.73509	0	2.02537	0.417894	0.260608	0	0.120117	1.40046	0.434249	0	0	0
grey60	RHC12H1G1971.2	2.07792	3.5823	1.32158	5.20391	1.30122	0.586928	0.309163	0	0.065381	1.02788	5.98414	6.85354	168.523	0.298877	1.62079	2.08812	0.265143	0.314527	62.3002	9.17874	23.4438	16.9222	0.861227	0.242769	0.35199	0.127173	0
grey60	RHC04H1G2503.2	0	0	0	1.93245	1.14443	1.08977	0	0	0	0	0	0	19.3802	0	0.216675	0.218085	0	0	0	0.486926	0	1.12214	0.261665	0.81136	0.235278	1.91261	0.296533
grey60	RHC08H1G1067.2	2.22789	3.78191	1.95629	0.350998	0.211646	0.345492	0	0.031998	0	5.02005	2.6419	1.75173	59.9879	4.09043	0.114489	6.74118	0	0	8.80144	3.08744	10.6545	0.385403	0.034565	0.035726	0.062159	0	0
grey60	RHC05H1G0530.2	3.58576	4.81148	2.89416	22.4993	10.524	9.29812	7.40787	9.64479	9.52904	3.20583	5.47738	6.28585	68.3313	7.10222	9.85982	12.5084	6.98316	8.66995	16.5933	6.92427	8.3974	9.52117	9.1784	8.97387	10.1487	11.1814	9.48783
grey60	RHC02H1G3130.2	0.264867	0.93807	0.624286	2.83757	2.19987	1.77476	1.34481	0.679032	1.25426	0.487233	1.18655	0.804634	20.3132	1.70008	1.85112	0.84425	1.41948	0.533222	3.54378	2.40498	1.76883	2.45662	1.74647	1.2997	1.3191	1.27657	1.02919
grey60	RHC10H1G2629.2	1.18635	3.83853	0.310688	16.0795	10.4919	2.86692	5.35415	3.18623	8.18725	0.513489	1.86011	0.096106	406.753	8.46079	6.56388	29.9905	3.44385	5.36323	43.7795	22.0291	30.1977	51.0802	19.9213	4.85114	16.4119	25.8359	13.4746
grey60	RHC07H1G2461.2	13.9969	22.2215	17.4352	72.5932	38.0661	38.4682	8.50019	4.42607	4.48736	16.6647	13.3312	19.2989	198.765	32.1225	17.3957	23.4864	5.92863	12.9014	31.3118	17.8339	20.6813	8.83674	9.87979	21.2542	6.33448	8.00675	6.76096
grey60	RHC03H1G0578.2	0	0	0	0.309409	0	0	0	0	0	0.275015	0	0	36.7764	0.959598	0	1.67607	0	0	1.00013	0	0.368973	1.43735	0	0	0	0	0
grey60	RHC01H1G0578.2	0.167802	0	0	0.163427	0.387136	0.221187	0	0	0	0.21789	0.075172	0	35.4505	0	1.02615	0	0	0	3.78585	0.9883	3.41054	3.41637	0	0.823397	0	0	0
grey60	RHC04H1G2462.2	12.2771	5.46567	10.5225	67.0318	7.55322	12.4233	1.93736	0.726683	5.24424	15.1367	5.66657	3.97828	162.219	5.6187	5.20019	11.1223	7.31063	11.0374	21.4721	6.5735	5.61713	4.37635	1.56999	1.62272	3.17625	0	2.6688
grey60	RHC07H1G2042.2	11.0923	19.1719	6.37946	9.10852	8.0286	7.83624	0	0	0	12.9913	3.7025	1.05716	104.907	22.1175	1.71006	24.6705	0.582805	5.89955	19.8564	9.82092	6.31512	4.13293	2.75352	9.2495	1.0316	4.47257	2.86041
grey60	RHC01H1G3701.2	5.03802	5.39469	5.116	10.1638	5.36091	4.92415	2.30228	2.25932	3.84975	7.16488	8.56712	5.84708	48.6006	3.67497	4.35634	6.14762	2.02039	2.87603	15.8063	11.1019	12.5384	12.2807	9.54553	9.52979	4.6816	7.84055	5.28584
grey60	RHC01H1G4299.2	2.98551	5.283	2.94349	9.92029	1.94482	1.74904	0.670654	0.114344	0.361017	3.74999	4.66796	4.49569	45.4032	1.29668	2.45475	3.13988	1.15033	0.099242	12.4702	4.59706	12.034	1.48318	0.802872	0.446836	0.721908	0	0.419935
grey60	RHC02H1G1784.2	6.68232	5.34688	7.26254	14.7246	6.55214	7.45032	5.56768	7.87222	3.67949	14.6062	11.8619	10.0688	64.1405	8.24187	5.43639	9.25428	4.17806	7.08033	20.8614	11.1511	21.7792	8.4275	5.15522	10.4746	5.66543	7.26435	5.94205
grey60	RHC05H1G2545.2	4.21283	7.31143	6.30145	6.21366	3.12143	4.07584	0.822683	0.296712	0.499631	4.41836	4.21005	5.96586	36.7325	5.62836	2.77797	4.87973	0.325636	0.892751	6.16364	4.1155	7.52748	2.43752	1.23935	3.2466	0.634036	0.763584	0.75068
grey60	RHC11H1G1649.2	0	0.1393	0	3.61994	2.20504	0.116651	0	0	0.233898	0.229824	0.118934	0.129044	20.6169	2.53941	0.6958	0.350165	0	0.112521	0	0	0	0.600583	1.12037	0.14475	0.125923	0	0
grey60	RHC09H1G2493.2	0.834879	0.963717	0.845422	2.98141	2.97912	3.37484	2.92739	2.66355	2.0595	1.44545	0.972424	0.919817	29.2893	2.35366	1.79908	4.25781	1.74	2.17023	8.90699	2.92299	3.62	3.9032	2.81856	3.03461	3.6695	4.12517	4.05924
grey60	RHC04H1G0675.2	0.753989	2.37366	1.9746	10.6478	1.73953	0.331288	0	0	0	0.326351	0	0	42.1866	3.79574	2.30542	4.64085	0.336732	0.319559	1.18682	0	0	0.682262	0.397731	0.822178	0	0	0
grey60	RHC10H1G2205.2	8.40596	8.42009	5.60358	69.8358	7.40475	12.3114	1.98972	0.746323	3.25403	16.3175	9.4713	9.28591	275.216	14.6187	16.5785	9.63111	4.43667	5.29	82.8636	20.6285	34.7616	4.49463	1.07495	3.05539	0.604091	0.763896	0.152274
grey60	RHC09H1G1673.2	1.27554	5.68876	2.89508	23.1894	8.33797	11.209	2.87836	1.97243	7.30448	5.06089	15.714	4.23661	105.309	19.1571	11.4218	15.4217	3.98761	2.25253	23.0894	5.53009	6.54303	29.6245	12.3356	4.75225	10.0833	4.55384	6.48137
paleturquoise	name	TFS_root_1	TFS_root_2	TFS_root_3	TFS_stem_1	TFS_stem_2	TFS_stem_3	TFS_leaf_1	TFS_leaf_2	TFS_leaf_3	SS_root_1	SS_root_2	SS_root_3	SS_stem_1	SS_stem_2	SS_stem_3	SS_leaf_1	SS_leaf_2	SS_leaf_3	TES_root_1	TES_root_2	TES_root_4	TES_stem_1	TES_stem_3	TES_stem_4	TES_leaf_1	TES_leaf_2	TES_leaf_3
paleturquoise	RHC12H1G0460.2	4.4577	5.21244	5.53687	15.3192	12.2237	11.5279	16.9126	13.0607	27.3226	7.828	13.9217	6.68586	13.5151	10.7717	19.1933	6.60739	31.2842	14.1426	12.4295	8.7515	5.62102	30.1371	36.7498	29.6512	30.9295	24.9358	34.49
paleturquoise	RHC01H1G3380.2	3.85562	5.57451	4.03894	9.93014	4.98138	7.15282	6.33574	5.52279	10.7944	6.15616	7.7534	6.41347	7.10825	6.38375	10.9283	4.82166	10.7142	6.39118	5.48455	4.7099	4.5775	11.707	12.3839	9.43636	12.3542	8.7362	10.7561
paleturquoise	RHC06H1G2898.2	26.0783	27.924	24.969	45.1226	37.7846	41.6887	32.1927	26.4624	44.5654	34.7631	36.1247	38.0943	43.5566	29.2129	41.525	26.366	41.8781	33.1579	35.6628	36.6281	34.5839	55.1862	74.5623	46.3609	41.5155	36.7259	42.1247
paleturquoise	RHC08H1G0523.2	37.994	38.1	41.2309	78.857	60.7847	71.9988	51.2827	44.1666	84.8502	67.1012	79.3092	68.4034	58.4261	58.958	83.4357	58.9759	81.7914	49.2956	50.9119	55.8249	53.8292	102.63	114.319	75.1522	73.7596	59.3961	68.57
paleturquoise	RHC01H1G1743.2	6.05208	8.63331	8.32104	25.7875	17.1917	19.6114	19.2051	14.6843	46.7378	8.84094	14.8269	12.8698	22.3498	12.187	30.7315	10.8926	39.6983	18.1155	16.2741	13.5525	11.2025	36.1097	55.8685	18.8702	34.626	18.3116	25.0992
paleturquoise	RHC08H1G1326.2	3.65213	3.83248	2.46824	8.37595	7.28428	6.7293	6.50306	6.78843	12.7665	4.69129	4.22215	5.61179	5.22787	8.30319	10.6008	6.31902	11.8909	8.08884	5.68684	9.0203	13.1355	16.4169	15.5364	9.12103	10.5052	9.79152	8.87376
paleturquoise	RHC07H1G0234.2	3.05237	2.02301	2.69263	6.72788	5.04068	5.22344	6.02342	4.70692	13.5874	4.45024	4.03023	1.71789	7.28389	7.11702	14.4556	0.847558	19.2282	5.44703	4.72031	4.57323	1.86583	11.3387	16.4403	11.9122	10.9725	7.98371	10.1799
paleturquoise	RHC02H1G3058.2	30.4361	34.4524	31.6996	32.1459	31.538	29.5182	35.2279	25.9023	49.2542	34.2365	33.4457	35.8344	36.0108	28.0563	39.45	37.6007	48.0052	31.5928	36.5364	41.9762	35.0776	53.9713	55.7768	47.0119	39.8446	32.2352	35.9001
paleturquoise	RHC01H1G2525.2	0.125109	0	0	3.8991	1.27001	0.219882	4.6908	0.977485	4.18843	0	0	0	6.75861	0.629825	6.12058	0.110008	4.13465	1.16653	0	0	0	10.6415	16.8947	2.59204	8.66363	2.25113	5.68399
paleturquoise	RHC12H1G0478.2	23.7261	26.5102	23.8883	32.5659	22.0088	26.8452	18.821	18.8495	27.5636	30.3825	37.6138	25.5742	23.2437	25.2499	31.3057	15.8899	28.0549	24.1753	28.6385	25.1	20.0601	39.434	43.8368	38.8747	39.7077	38.0776	38.8755
paleturquoise	RHC12H1G0220.2	0	0	0	22.161	0.559134	1.30149	5.11831	2.16967	49.9389	0	0	0	26.6264	2.37234	70.1623	0.769529	52.6144	0.456513	0.070644	0.264331	0	64.6321	89.7024	12.7731	26.5023	1.73046	14.4073
paleturquoise	RHC11H1G0829.2	12.1511	12.8737	8.68985	15.4756	15.4186	14.1687	16.1841	16.5455	16.7783	14.1598	18.0052	11.1308	14.8777	18.3513	21.8429	13.9719	15.1321	8.81428	16.6743	16.1712	8.95599	24.4219	25.6388	22.9326	18.5092	13.6149	18.439
paleturquoise	RHC01H1G4494.2	49.2972	45.233	53.7465	73.4065	58.5775	63.5606	76.6888	75.5471	110.002	52.55	62.3466	62.8145	54.7089	46.8452	80.3906	42.2243	112.034	72.4303	68.5186	65.9076	59.3366	98.2103	121.124	90.4514	99.4024	73.0051	96.9655
paleturquoise	RHC06H1G2866.2	3.23625	3.93227	2.31955	14.764	8.95962	8.08264	7.45065	1.82984	19.8081	2.21171	2.89955	2.31812	6.07955	3.0869	16.6657	1.64746	21.6036	3.89824	3.57476	3.00955	2.76952	34.37	22.8216	13.187	8.72512	5.25392	9.16395
paleturquoise	RHC02H1G2055.2	0	0	0	4.78159	2.29269	1.35149	2.77228	1.21317	11.6213	0	0.105995	0	4.05143	0.595566	9.55997	0.364083	4.64944	0.55154	0.620722	0.058064	0	17.9308	16.2254	2.51555	9.98798	4.4601	10.8911
paleturquoise	RHC09H1G0128.2	43.2876	45.4627	46.9934	94.6227	77.4871	83.9634	78.9991	62.1052	101.656	63.1557	64.341	55.9455	82.5861	54.6688	86.4375	48.309	83.587	67.5074	75.9955	67.8255	66.0093	112.075	127.276	92.8848	93.045	69.8309	93.5936
paleturquoise	RHC09H1G0239.2	5.77989	7.62261	6.54562	40.165	29.6249	33.5635	24.6483	25.1729	43.0079	9.53358	13.5762	4.40388	32.7762	18.2447	84.4743	7.4173	41.7892	20.2593	4.67187	6.13365	2.54	54.0674	73.7504	62.0892	39.1952	19.4079	30.443
paleturquoise	RHC09H1G1249.2	74.1324	87.158	80.7116	81.4934	71.0217	66.2318	71.7791	57.9893	113.886	73.8878	66.4988	79.5385	61.2001	68.0565	115.785	50.8111	123.512	63.1379	98.9326	74.6777	59.4174	113.293	146.352	88.352	103.599	75.0262	104.478
paleturquoise	RHC02H1G1257.2	8.69252	7.31746	11.3072	50.5627	27.9882	50.9524	16.3157	17.9118	78.6016	4.2172	10.6552	12.0717	37.965	9.23289	92.5449	3.69566	125.635	18.8254	33.1287	54.1968	52.4198	167.727	258.995	51.9763	134.879	56.8421	97.874
paleturquoise	RHC07H1G1622.2	0.134641	0	0	215.447	21.3714	42.5942	56.0911	30.7698	110.554	0	0.120633	0	191.45	9.21823	289.118	8.99757	112.805	21.6844	0.141288	0.792993	0	267.91	253.269	49.037	148.285	22.496	123.307
paleturquoise	RHC04H1G2121.2	7.92669	11.5768	5.99227	13.5299	10.8595	11.8488	13.1919	12.6098	30.3098	11.177	8.05381	9.6917	12.2978	12.5885	24.1298	14.802	30.5102	16.2089	12.3484	10.5083	5.88438	30.0954	47.7621	24.3267	28.6046	29.1277	24.5231
paleturquoise	RHC05H1G0312.2	26.0357	29.7087	19.4055	104.1	81.478	84.3135	123.997	94.2331	244.457	29.5091	33.4213	31.3126	122.236	73.0426	109.214	119.8	210.974	145.118	47.1772	33.2844	30.5739	188.766	360.777	127.304	188.265	148.329	202.829
paleturquoise	RHC09H1G2049.2	17.9627	20.6823	15.6806	27.0514	20.6441	22.8735	23.9913	22.3348	36.0465	25.0522	35.8386	25.7886	19.2535	24.5328	40.1026	11.1146	36.1739	19.4555	30.9795	29.2241	22.987	41.2367	52.0267	36.998	32.0282	29.428	36.6882
paleturquoise	RHC05H1G2609.2	0.101343	1.06347	0.106161	3.25711	4.11502	2.67168	0.316643	0.19795	6.42843	0.701829	1.63438	0.295552	3.12841	3.57126	11.5979	0.08911	9.68557	0.343612	1.27615	2.28803	1.05931	8.06976	13.6853	9.17214	3.74926	1.64983	1.6963
paleturquoise	RHC01H1G4550.2	32.1053	37.2321	38.1224	71.7748	57.9095	56.5061	70.1048	65.9172	116.194	50.9265	67.2547	45.574	60.2708	61.8951	113.066	45.4729	120.083	68.2671	63.1694	63.1197	42.9021	135.93	141.355	97.6667	101.317	61.7383	80.041
paleturquoise	RHC08H1G1029.2	16.6917	18.5391	20.3043	22.2958	20.9823	20.2543	23.8426	19.3869	33.5342	19.4122	23.3761	23.2781	25.0561	17.7091	30.1521	15.8772	31.4206	21.7521	28.5655	27.0657	22.3303	39.383	39.0873	30.9592	36.6254	25.3626	33.1054
paleturquoise	RHC01H1G3809.2	4.06292	3.56746	3.21378	4.52227	3.36683	3.71606	2.59072	4.61582	9.71569	5.23979	7.87474	6.529	4.07938	5.00905	8.54752	2.77051	7.33207	3.44393	6.35175	4.63936	3.75574	13.4301	16.8831	11.6636	7.15768	8.02811	8.12901
paleturquoise	RHC11H1G0851.2	11.5869	12.9521	15.3042	52.6215	38.3549	42.112	55.4196	32.78	55.7566	22.5138	30.2415	19.4057	44.5282	20.0988	46.266	13.9536	56.922	36.7244	26.6308	26.5185	19.4545	56.0701	68.8277	40.3764	70.3098	46.6723	63.0923
paleturquoise	RHC06H1G2915.2	1.51739	2.9324	2.32922	8.66213	8.69303	8.47584	5.3513	3.19864	9.02695	5.57935	9.38205	2.70189	8.37695	5.38504	9.46299	4.58396	7.39397	4.20249	6.93678	3.15596	1.58784	14.6684	15.6915	9.82944	8.494	8.14842	8.83739
paleturquoise	RHC05H1G0200.2	1.45745	4.89415	1.52675	9.08449	4.57299	4.86687	2.42869	1.4234	24.9102	2.01866	9.66306	2.55028	3.37433	14.6743	27.7567	0.256306	37.4918	1.97665	9.7882	5.4365	4.40105	31.1238	61.8122	9.21771	33.1814	16.7337	26.4862
steelblue	name	TFS_root_1	TFS_root_2	TFS_root_3	TFS_stem_1	TFS_stem_2	TFS_stem_3	TFS_leaf_1	TFS_leaf_2	TFS_leaf_3	SS_root_1	SS_root_2	SS_root_3	SS_stem_1	SS_stem_2	SS_stem_3	SS_leaf_1	SS_leaf_2	SS_leaf_3	TES_root_1	TES_root_2	TES_root_4	TES_stem_1	TES_stem_3	TES_stem_4	TES_leaf_1	TES_leaf_2	TES_leaf_3
steelblue	RHC01H1G2535.2	0.243222	0.319041	0.318483	7.9355	6.902	9.77835	0.759944	0.356309	0.642843	0.579009	0.217917	0	3.87141	3.6733	8.81795	0.213864	0.217246	0.515418	0.25523	0.537189	0.070621	16.8915	10.0074	13.5924	1.78811	0.885697	0.94508
steelblue	RHC10H1G2231.2	0.576192	1.64118	1.16406	6.65386	5.01349	8.64388	1.15734	0.56273	1.48663	0.605673	0.589994	0.880202	4.88345	8.49484	7.69431	2.64178	2.31595	0.941932	0.604639	2.1412	1.0516	11.88	7.33804	18.2207	1.99113	1.51636	2.26349
steelblue	RHC11H1G2012.2	115.29	126.12	122.991	396.41	381.685	376.038	121.672	65.0747	104.275	202.198	224.33	153.767	463.266	309.912	470.913	82.4226	115.768	101.379	151.649	190.411	141.113	451.932	406.132	514.498	182.484	149.428	144.478
steelblue	RHC01H1G4671.2	225.619	238.276	278.805	602.95	647.841	719.13	362.588	227.744	251.241	283.605	308.761	312.579	653.002	559.93	616.209	352.843	278.527	323.872	295.127	393.902	370.492	724.851	646.068	810.702	377.368	316.479	342.818
steelblue	RHC02H1G3213.2	0.164006	0.275367	0.274886	4.50437	4.93405	5.33251	0.478271	0.096104	0.231185	0.397527	0.205719	0.031887	3.73381	2.74113	2.55032	0.173051	0.29298	0.250235	0.413046	0.289783	0.380958	8.10285	5.05238	12.1967	1.30686	0.337259	0.392167
steelblue	RHC01H1G0265.2	0	0.069814	0.069692	13.2827	14.612	14.0895	5.26596	1.23451	0.996406	0	0	0.064674	11.0387	2.8803	3.95214	1.75494	2.31751	1.91735	0.069813	0	0	30.762	18.8805	24.2301	9.40336	7.58145	8.43131
steelblue	RHC04H1G2200.2	1.3845	7.07062	1.25695	66.3414	67.9723	60.8323	11.1511	4.05646	6.91196	1.99752	6.94656	4.0377	72.6564	47.4881	55.6375	8.03474	4.94655	5.86786	15.594	7.15765	5.57435	134.8	76.8304	140.906	41.5021	51.5635	38.0718
steelblue	RHC04H1G2966.2	13.1417	13.2683	12.7236	39.0759	30.1355	37.6199	16.694	14.8765	18.2441	19.3053	22.2109	15.2917	31.1175	25.0599	41.3131	17.4207	16.6291	17.6376	10.5518	12.5092	12.141	49.2778	41.5936	66.8743	14.9219	10.8337	13.2124
steelblue	RHC11H1G2409.2	7.64506	10.1874	9.27975	131.423	168.204	160.597	21.6119	17.5402	24.1618	9.76951	14.8953	16.9872	133.452	152.115	152.658	21.4472	25.2549	20.7782	16.6817	18.4635	14.5166	222.467	154.27	248.109	75.6302	62.5936	57.5987
steelblue	RHC02H1G1473.2	2.63577	5.33627	1.42238	24.9185	37.4687	29.8066	4.76933	2.8082	4.80846	1.12932	0.90645	4.91751	15.744	24.8761	22.1657	4.65864	4.7561	6.72518	1.06166	3.8679	1.70068	32.2581	22.6673	39.1057	16.9972	9.6267	14.0058
steelblue	RHC12H1G1828.2	0.110448	0	0.077133	10.5417	40.5324	20.7702	3.64263	0.934847	2.52994	0	0	0	20.3858	0.296542	3.6987	0.679812	2.07169	2.74621	0	0	0	107.07	54.3384	48.1343	12.5028	3.18603	4.26962
steelblue	RHC07H1G1629.2	3.28653	4.76265	2.13125	33.2278	21.3269	26.5428	4.45521	1.93603	10.295	8.12866	6.49681	2.48492	39.706	16.8602	59.1545	0.458703	8.99298	3.36068	7.39025	4.71114	3.08998	60.5161	64.1175	54.4389	12.6685	3.08418	9.97928
steelblue	RHC11H1G0435.2	1.25086	1.36732	0.873553	12.487	9.86	13.6714	1.11278	0.738069	1.3316	1.64679	0.957279	1.39331	8.17018	3.04359	5.55486	1.03113	1.00089	1.54625	1.96892	1.27902	1.39224	12.3797	9.59502	25.5178	2.66981	1.89792	2.27442
steelblue	RHC04H1G1954.2	124.595	130.747	121.188	357.078	491.178	480.095	124.803	134.125	96.9032	151.699	162.669	107.831	366.675	335.464	368.161	173.303	95.5616	100.608	156.721	242.27	189.814	493.328	319.714	627.927	203.373	317.606	195.523
steelblue	RHC05H1G0653.2	11.3098	7.85403	10.4537	56.8566	68.7626	58.9011	7.10212	4.71062	9.37794	9.79052	7.59986	12.4497	52.4659	14.234	44.8975	6.87353	9.50773	6.48517	7.33036	8.16317	6.18139	80.3664	41.2353	100.294	11.9909	4.56027	7.75522
steelblue	RHC04H1G2213.2	0	0.69148	0.251008	14.1187	10.393	10.8967	3.61859	2.8082	4.43316	0.103713	0.107343	0.407636	8.89932	3.076	7.84986	1.63287	4.65503	1.32021	0.942918	0.588025	0.41744	61.3602	37.4136	43.1121	14.4337	6.9805	9.88361
steelblue	RHC01H1G1936.2	19.7527	27.7756	22.1699	47.1048	48.9047	56.2397	12.2846	6.94483	17.5017	24.0366	30.5916	19.5312	46.2764	70.3463	70.0105	9.18047	22.0791	8.56304	34.4083	39.0561	36.3126	92.7386	72.8776	102.957	39.7774	21.0833	30.3636
steelblue	RHC12H1G2086.2	0.32553	1.41522	0.974307	36.1881	26.0071	47.4456	6.97448	2.90673	6.80113	1.9726	6.83321	3.20975	16.1502	35.5851	24.1728	0.695146	5.31682	2.0498	9.95523	11.5493	2.64653	35.2212	26.3954	64.2495	21.2191	13.9063	14.456
steelblue	RHC07H1G2339.2	36.4871	31.2713	39.5124	57.8742	54.6761	59.7453	35.313	40.2178	38.7606	44.9917	45.5151	38.8344	54.4385	52.4474	65.3395	46.2159	35.8389	41.9173	56.2016	37.659	37.5396	86.9459	79.3398	83.6677	47.2439	42.9743	49.3747
steelblue	RHC09H1G0716.2	4.57383	4.92436	1.92896	11.9753	7.72921	10.9095	4.51616	4.1769	5.49489	4.62787	5.16237	2.94496	7.62119	8.85142	14.1148	2.61152	4.77509	4.02806	6.48263	7.75501	5.45011	20.1561	13.4735	19.4317	11.2696	10.3319	7.74102
steelblue	RHC01H1G4737.2	5.08371	9.11103	4.1287	26.6473	19.2402	29.565	4.4023	4.07236	7.14594	6.67535	10.6961	7.71837	14.6022	23.177	31.1381	1.15519	5.30608	3.4861	8.63142	13.4569	6.56772	37.421	25.1293	41.794	10.5661	4.55163	9.62925
steelblue	RHC08H1G1616.2	0.142801	0.149852	0	58.1345	32.5503	53.7089	4.46179	0.976251	6.16463	0.123618	0	0	62.6793	21.5667	87.7007	0.251128	7.01525	2.05777	0	0	0.995109	103.502	72.164	74.432	9.21148	0.611779	2.56097
steelblue	RHC10H1G1170.2	18.8497	20.8731	17.6221	332.156	172.84	213.604	4.8509	0.749216	13.8551	38.6118	21.4053	11.4526	162.016	157.347	546.818	0.28909	10.7187	1.02185	40.0207	97.4644	42.512	736.357	521.732	343.928	22.4553	0.563405	3.86528
steelblue	RHC01H1G3794.2	47.1571	34.8309	52.1293	133.52	122.342	129.894	68.575	66.3215	96.1749	97.6498	101.287	46.177	95.584	103.97	164.444	28.018	95.8368	59.5214	50.6204	52.4686	44.6034	194.623	176.333	162.63	103.182	81.4429	82.6601
steelblue	RHC01H1G0199.2	0	0	0.093435	8.16565	9.21896	14.5004	0.092895	0.08711	0.314324	0	0	0	7.82997	0.269414	9.03881	0.078428	0.398342	0.226816	0	0	0	28.7325	13.174	35.1111	2.11527	0.152848	1.0664
steelblue	RHC03H1G2045.2	4.65948	7.66773	6.21221	27.7436	25.6043	29.6857	9.37477	6.51565	9.51624	6.60035	10.4368	6.58847	18.7968	22.9237	28.6789	8.38035	7.85077	8.4378	9.00116	13.5136	7.62545	36.317	28.2657	40.8779	22.4016	13.3382	15.0666
steelblue	RHC09H1G0733.2	0.187249	4.1264	0.294228	321.33	304.648	320.044	21.8421	5.9434	29.6942	1.21571	0.922721	0.091014	297.325	305.702	578.099	4.77476	38.8022	14.6024	0.88422	6.34132	0.434949	985.693	720.261	849.708	189.794	71.8771	118.541
steelblue	RHC01H1G4540.2	5.65492	8.80122	7.12185	241.586	115.337	160.47	32.4257	9.99067	25.9737	10.7806	12.5241	7.41203	218.636	55.4648	301.406	3.79909	26.9575	11.2564	8.06771	7.11021	4.94424	304.948	153.104	342.058	43.8188	8.32954	12.7623
steelblue	RHC03H1G1659.2	68.699	67.2118	66.2301	155.217	141.123	165.886	86.8594	67.4601	84.3113	99.2686	118.063	85.0107	150.053	147.475	169.499	65.8143	83.0665	76.2237	122.381	101.669	93.2895	198.096	171.62	210.015	101.382	87.6521	97.6483
steelblue	RHC06H1G2167.2	3.45213	3.88135	3.61626	9.60606	8.26782	10.3287	3.93779	2.0871	3.33101	4.12682	5.52316	2.79657	5.15386	8.19285	11.3452	2.67408	3.01003	3.20488	4.14007	3.63071	3.72298	11.3049	8.67145	12.727	7.09526	5.98618	5.69965

## Sheet: Table S8
Table S8 Primers used in this study.
Gene ID	Forward primer (5’-3’)	Reverse primer (5’-3’)
RHC01H1G0199.2	CACATTTCGTATTACAGAGTTGGG	ATAGGTAGTGATTGAAAGAGGGTGT
RHC01H1G3797.2	TAGCAGGTCTCCAGAGGTGTG	TTATCTGTTCTTCCAGGCAATCTA
RHC01H1G4299.2	TGGTCCTGTTTCGCTCTGC	TTCATTTGTTGTATTTTGCCTCAC
RHC01H1G4671.2	GCAGCCCAAATCTGTCGTC	TTGTCCTCTTCGCCACCC
RHC01H1G4737.2	ATTGGAGGTGGAATCAGCG	TGGTCAGGAAACACTTGGGT
RHC02H1G1257.2	CAAGATGTCGGATGCTAAGGTC	GTAATACAAGAACGAGAATGGAAGG
RHC02H1G1300.2	GGCAACTCCAGTATCTTTTCATT	TACATAGTCTGAATCCCTCGTTTAC
RHC02H1G1413.2	AGACAGAGGAGTGGAAAGGATG	GCAAACCGAGCAAGACTAAAA
RHC02H1G2055.2	TCGTGGAAGGGCACAATG	CCATACCAACTGTAGAAGCATAATC
RHC02H1G3058.2	GGTGCTTCGCTTCCTCCT	TCAGTGGCATCACGGTTCA
RHC02H1G3130.2	CGTGGCTTCCGATTACTTCT	ATCATTTCGTGCATTTCAACC
RHC03H1G1659.2	GCCATCAACCGAAAGCAA	ACATAGGTGGTCAGGGTCTCAT
RHC03H1G1792.2	CTCAAAGTGTAGGCATCCCG	CACCAGTAGTCACAATCCCATCT
RHC03H1G2045.2	GAGGAACCTGGCGGACTG	CGTCAATGTAATACCCTTCAAACT
RHC04H1G0675.2	CTTCTTCTTTTGTGGTCAAGGTAT	AGTTTGCGTCCATTTCGATTA
RHC04H1G0822.2	CAAAGGTTGGGGTGGAAAAT	CGCAGGAAGTTGGGAGACA
RHC04H1G1008.2	GTGCGTGGCGGTGTTCTT	CCCTCCTCCAATTAGTTCCCT
RHC04H1G2194.2	TGACCGTGGCTTGTTTGG	TCGGGCACCTTTTCTTGAT
RHC04H1G2200.2	CGGAATCAGTGGGATGAAGTC	CGTTACCTTTGTTACCATTTGCT
RHC04H1G3122.2	CAACCTGCTTGGGAACACA	CCCCTCCTACATTGCTTATCAT
RHC05H1G0200.2	TGGTTTAGTGGTGAGGGATTG	CTTTGCTCAACTCTATCGCTCTC
RHC05H1G0653.2	AGAATTAGGTCACAAATCTGATGGT	CCAGTAGCAGCAATAACAGCAG
RHC07H1G1629.2	GCTGGAGGCTATGGTGGC	TTGGAAATCCTGAATCTGTAAGTC
RHC07H1G2042.2	TAGAAGTTGTGGGAGAAGTAGACG	ATTGATAAGACGGATAGGCATAGTA
RHC08H1G0523.2	AAAACCGTAAACCCAAACTTCA	CGAGGAGGAAAATGCCGTA
RHC08H1G1029.2	GTGCTGTAGGTGTTGGTCGTC	CTGAACAAAGAATCATACAGAGCC
RHC08H1G1438.2	CATTTCCTTTGCCGTTATTGA	GCTTTAGAACCTCCGTGCC
RHC08H1G1616.2	GAAATCCTGGACCACGAACTC	TTCCCAAACTTCATCCCTCTAT
RHC08H1G2453.2	CGGACATTGAATACAAAAGCG	CAGCAGGTATGTAAAGCAAAGTTC
RHC09H1G1249.2	CAAGCGGATAAGGCAAGAGA	GCCACCAGCAGAAAGAAGAG
RHC09H1G1673.2	TTGGAAAGGTGTTGGCTGAA	GTCATTGCTGCTAACATCTCCTC
RHC09H1G2049.2	TCACAGCCAAGATTCATACAGC	CCAACATCCACCACAGTCAAA
RHC09H1G2493.2	TGGGACTATTTTGGCTGTGATT	GAAACGGGCTCGGTTCTTAT
RHC10H1G2231.2	CATGATACGGTTAATGAAGACGAC	AGAAATGAAAGGTTTACTGAGGGA
RHC10H1G2629.2	GAAGAGCATACCGCAACCTG	CGGACTCCCTCCTTTCACAT
RHC11H1G0118.2	TTCACGAGCCGAATAAGGTTT	TTTTCCCTCTATTTGTTCCATTTAT
RHC11H1G0319.2	ATCCGACCTACAAGAATCAAGACT	GATAAGGGCATCCCCGAGT
RHC11H1G0851.2	GGGGTTGGATTTGAGGGG	TACTGCTGGAGCCGCTGG
RHC12H1G0460.2	AGAAGACGGTAGCCTCATTGG	GCAGTTCTATCAATCCATTCGTAA
RHC12H1G1971.2	TGGAAACATAGTCATCGTCGTC	GCAAAAGTTAGAGTGAAGGCAAG
Actin (PGSC0003DMC400040523)	GAGGTTCCGTTGCCCAGA	CTGAGCACAATGTTACCATAGAGG
